1 Acute characterization of tissue and functional deficits in a clinically translatable  
2 pig model of ischemic stroke  
3  
4

5 Erin E. Kaiser<sup>1,2,3</sup>¶ Elizabeth S. Waters<sup>1,2,3</sup>¶, Madison M. Fagan<sup>1,3</sup>, Kelly M. Scheulin<sup>1,2,3</sup>, Simon  
6 R. Platt<sup>1,4</sup>, Julie H. Jeon<sup>5</sup>, Xi Fang<sup>5</sup>, Holly A. Kinder<sup>1,2,3</sup>, Soo K. Shin<sup>1,3,6</sup>, Kylee J. Duberstein<sup>1,3</sup>,  
7 Hea J. Park<sup>5</sup>, Franklin D. West<sup>1,2,3\*</sup>  
8  
9  
10

11 <sup>1</sup>Regenerative Bioscience Center, University of Georgia, Athens, Georgia, United States of  
12 America  
13

14 <sup>2</sup>Neuroscience Program, Biomedical and Health Sciences Institute, University of Georgia,  
15 Athens, Georgia, United States of America  
16

17 <sup>3</sup>Department of Animal and Dairy Science, College of Agricultural and Environmental Sciences  
18 at the University of Georgia, Athens, Georgia, United States of America  
19

20 <sup>4</sup>Department of Small Animal Medicine and Surgery, College of Veterinary Medicine at the  
21 University of Georgia, Athens, Georgia, United States of America  
22

23 <sup>5</sup>Department of Foods and Nutrition, College of Family and Consumer Sciences at the University  
24 of Georgia, Athens, Georgia, United States of America  
25

26 <sup>6</sup>Department of Pharmaceutical and Biomedical Sciences, Interdisciplinary Toxicology Institute,  
27 University of Georgia, Athens, Georgia, United States of America  
28  
29

30 \* Corresponding author: F. D. West.

31 Email: [westf@uga.edu](mailto:westf@uga.edu)  
32

33 ¶ These authors contributed equally to this work  
1

## 34 **Abstract**

35           The acute stroke phase is a critical time frame used to evaluate stroke severity, therapeutic  
36 options, and prognosis while also serving as a major target for the development of diagnostics. To  
37 better understand stroke pathophysiology and to enhance the development of treatments, our group  
38 developed a translational pig ischemic stroke model. In this study, the evolution of acute ischemic  
39 stroke tissue damage, immune response, and functional deficits were further characterized in the  
40 pig model. Stroke was induced by middle cerebral artery occlusion in Landrace pigs. At 24 hours  
41 post-stroke, magnetic resonance imaging revealed a decrease in ipsilateral diffusivity and an  
42 increase in hemispheric swelling and intracranial hemorrhage resulting in notable midline shift.  
43 Stroke negatively impacted white matter integrity leading to decreased fractional anisotropy.  
44 Similar to acute clinical patients, stroked pigs showed a reduction in circulating lymphocytes and  
45 a surge in neutrophils and band cells. Functional responses corresponded with structural changes  
46 with reduced exploration in open field testing and impairments in spatiotemporal gait parameters.  
47 This novel, acute ischemia characterization provides important insights into tissue and functional  
48 level changes in a pig model that can be used to identify treatment targets and future testing of  
49 therapeutics and diagnostics.

50

51 **Keywords:** brain ischemia, gait analysis, magnetic resonance imaging, porcine, acute stroke

52

53

54

## 55 **Introduction**

56           Every year, 6.2 million people worldwide die from stroke making it the leading cause of  
57 death in individuals over the age of 60 and the fifth leading cause of death in individuals ages 15-  
58 59 (1, 2). Of the patients that survive, approximately 5 million are left permanently disabled  
59 making stroke a global medical and socioeconomic problem (3). The acute phase of ischemic  
60 stroke is a critical time window to determine stroke severity, treatment options, and future  
61 prognosis in clinical patients. Specifically, the acute phase is a major target for the development  
62 of novel therapeutics and diagnostics as an early reduction in brain tissue loss is directly correlated  
63 with improvements in functional outcomes. In addition, all current Food and Drug Administrative  
64 approved treatments, tissue plasminogen activator (tPA) and thrombectomy, are only effective  
65 during this acute window (4-6). The acute phase of ischemic stroke has also been the focus of  
66 diagnostic and prognostic tool development; tools including magnetic resonance imaging (MRI)  
67 that can rapidly and accurately identify ischemic stroke and has demonstrated strong predictive  
68 value with respect to long-term patient outcomes (7-11). However, the development of therapies  
69 and diagnostic tools has been slower than desired particularly with respect to treatments with  
70 numerous failed clinical trials (12-15).

71           A potential opportunity to hasten the speed at which therapies and diagnostics reach  
72 patients is through the use of translational large animal models that are more predictive of human  
73 outcomes. Assessments by the Stem Cell Emerging Paradigm in Stroke (STEPS) and the Stroke  
74 Therapy Academic Industry Roundtable (STAIR) consortiums identified therapeutic testing in  
75 higher-order gyrencephalic species and in translational animal models more reflective of human  
76 pathology and physiology as major needs in pre-clinical stroke studies to better predict therapeutic  
77 efficacy (6, 16-21). To address this unmet need, a pig ischemic stroke model has been recently

78 developed by our research team with anatomy, physiology, and stroke pathology similar to human  
79 patients (22-25). The pig brain is similar in mass compared to humans being only 7.5 times smaller,  
80 whereas the rodent brain is 650 times smaller in comparison to humans (26). This allots for a more  
81 direct assessment of therapeutic dosing in a pre-clinical model. The pig's brain size is also an  
82 advantage in developing diagnostic tools as human 3T MRI scanners and coils can be used to  
83 develop new MRI sequences and analytical tools. In terms of cytoarchitecture, human and pig  
84 brains are gyrencephalic and are composed of >60% white matter (WM), while rodent brains are  
85 lissencephalic and are composed of <10% WM, making pig tissue responses potentially more  
86 predictive of human outcomes (27-30). These attributes are critically important as WM and gray  
87 matter (GM) exhibit differing sensitivities to hypoxia (30). Although the failure of  
88 pharmacological translation is multifactorial, the failure to ameliorate ischemic damage to WM is  
89 proposed to be a major factor (31). The similarities between pig and humans in brain size,  
90 cytoarchitecture, and WM composition collectively support the use of a pig ischemic stroke model  
91 to more accurately predict potential outcomes of human clinical trials. However, more in depth  
92 characterization of the acute ischemic stroke timepoint is needed in the pig model to better  
93 understand similarities and differences between human and pig acute stroke outcomes.

94 MRI is an excellent tool for use in the pig ischemic stroke model as it allows for  
95 bidirectional development of the pig model as well as MRI diagnostic and prognostics. MRI allows  
96 for the assessment of stroke evolution in the pig model and evaluation of novel therapeutic  
97 efficacy. In addition, new MRI sequences and post-processing tools can be developed in the pig  
98 for use in clinical settings. Acute MRI assessment of ischemic stroke patients has become the  
99 standard of care in diagnosing and predicting patient clinical outcomes (8, 32). Clinically,  
100 diffusion-weighted imaging (DWI) has been shown to reliably enable early identification of the

101 lesion size, location, and age with high sensitivity and specificity (7, 33-38). Moreover, acute stage  
102 DWI lesion volume measures have proven to be highly correlated with chronic lesion size and  
103 stroke severity as determined by Modified Rankin Scale (mRS) and National Institutes of Health  
104 Stroke Scale (NIHSS), suggesting DWI provides valuable prognostic information (7-9, 38-40).  
105 DWI derived apparent diffusion coefficient (ADC) maps have aided in further understanding the  
106 time course of acute ischemic brain damage by tracking the diffusion of water in the hypoxic brain  
107 parenchyma from extracellular to intracellular compartments (41, 42). In conjunction with other  
108 MR techniques, ADC hypointensities allow clinicians to differentiate between regions at risk for  
109 cerebral infarction and irreversibly damaged tissue in order to establish time windows for stroke  
110 treatment and to identify patients who are most likely to benefit from acute stroke therapies (7, 40,  
111 43, 44). Disruption of WM structural integrity is also associated with poor early neurological  
112 outcomes in stroke patients (45). Diffusion tensor imaging (DTI) studies of human stroke reveal  
113 notable alterations in WM fractional anisotropy (FA) that correspond with the temporal evolution  
114 of stroke (10, 11). FA analysis has improved the identification of ischemic lesions at acute and  
115 subacute time points and has proved particularly useful in determining time of stroke onset, which  
116 is frequently unknown in clinical settings (11). Recently, progressive structural remodeling of  
117 contralateral WM tracts related to motor, cognitive, and sensory processing was positively  
118 associated with motor function recovery in the acute and sub-acute stages post-stroke as well as 1,  
119 4, and 12 weeks post-ischemic onset in patients (46, 47). Acute MRI analysis in the pig stroke  
120 model will allow for the characterization of clinically relevant parameters and to assess for  
121 correlations with acute functional changes as observed in human patients.

122 Ischemic stroke leads to a wide array of acute deficits in behavior, cognition, and  
123 sensorimotor function in clinical patients thus resulting in poor mRS scale scores (48).

124 Neurological deficits in executive function, episodic memory, visuospatial function, and language  
125 manifest within 48 to 72 hours in 33.6% of patients (49-52). Occlusions of the middle cerebral  
126 artery (MCA) and territorial infarction are regularly linked to acute limb paresis that is sustained  
127 long-term (52). Understanding these motor impairments are essential to planning rehabilitation  
128 efforts to restore ambulatory activity levels and balance deficiencies in stroke survivors (53, 54).  
129 Specifically, improvements in foot placement, stride length, and walking speed are recognized as  
130 powerful indicators of long-term recovery (55-59). Among these neurologic and functional  
131 consequences, post-stroke depression (PSD) is the most frequent psychiatric problem occurring in  
132 one-third of stroke survivors (60). PSD is strongly associated with further inhibition of recovery  
133 processes due to the combination of ischemia-induced neurobiological dysfunctions and  
134 psychosocial distress (61, 62). The pig stroke model offers a unique opportunity to study acute  
135 changes in behavior, cognition, and motor function due to anatomical similarities in the size of the  
136 prefrontal cortex and cerebellum in addition to somatotopical organization of the motor and  
137 somatosensory cortices which are critically important in modeling human motor function effects  
138 in the acute ischemic stroke phase (26, 63-65).

139         The objective of this study was to utilize clinically relevant assessment modalities to  
140 characterize acute ischemic stroke in a pig model that will provide a translational platform to study  
141 potential diagnostics and therapeutic interventions. We present evidence pigs display an acute  
142 ischemic stroke response similar to human patients including brain lesioning, swelling, loss of  
143 WM integrity, and increased white blood cell (WBC) counts. These physiological changes  
144 correlated with aberrant behavior and worsened motor function. This compelling evidence  
145 suggests the pig stroke model could serve as a valuable tool in bridging the gap between pre-  
146 clinical rodent studies and human clinical trials.

## 147 **Materials and methods**

### 148 **Animals and housing**

149 All work performed in this study was approved by the University of Georgia Institutional  
150 Animal Care and Use Committee (IACUC; Protocol Number: 2017-07-019Y1A0) and in  
151 accordance with the National Institutes of Health Guide for the Care and Use of Laboratory  
152 Animals guidelines. 6, sexually mature, castrated male Landrace pigs, 5-6 months old and 48-56  
153 kg were purchased from the University of Georgia Swine Unit and enrolled in this study. Male  
154 pigs were used in accordance with the STAIR guidelines that suggests initial therapeutic  
155 evaluations should be performed with young, healthy male animals (66). Pigs were individually  
156 housed in a Public Health Service (PHS) and AAALAC approved facility at a room temperature  
157 approximately 27°C with a 12 hour light/dark cycle. Pigs were given access to water and fed  
158 standard grower diets with provision of enrichment through daily human contact and toys.

### 159 **Study design**

160 The sample size for this study was determined by a power calculation based on our routine  
161 use of the middle cerebral artery occlusion model with lesion volume changes by MRI imaging  
162 being the primary endpoint (67). The power analysis was calculated using a two-tailed ANOVA  
163 test,  $\alpha=0.05$ , and an 80% power of detection effect size of 1.19 and a standard deviation of 44.63.  
164 This was a randomized study where 2 pigs were randomly assigned to each surgical day. All  
165 endpoints and functional measurements were prospectively planned and underwent blinded  
166 analysis. Predefined exclusion criteria from all endpoints included instances of infection at the  
167 incision site, self-inflicted injuries that required euthanasia, inability to thermoregulate,  
168 uncontrolled seizure activity, and/or respiratory distress. 1 pig was excluded from MRI collection

169 as well as post-stroke blood and functional analysis due to post-operative complications and  
170 premature death. No outliers were removed from the data.

## 171 **Middle cerebral artery occlusion surgical procedures**

172 The day prior to surgery, pigs were administered antibiotics (Excede; 5 mg/kg  
173 intramuscular (IM) and fentanyl for pain management (fentanyl patch; 100 mg/kg/hr transdermal  
174 (TD)). Pre-induction analgesia and sedation were achieved using xylazine (2 mg/kg IM) and  
175 midazolam (0.2 mg/kg IM). Anesthesia was induced with intravenous (IV) propofol to effect and  
176 prophylactic lidocaine (1.0 mL 2% lidocaine) topically to the laryngeal folds to facilitate  
177 intubation. Anesthesia was maintained with isoflurane (Abbott Laboratories) in oxygen.

178 As previously described, a curvilinear skin incision extended from the right orbit to an area  
179 rostral to the auricle (24). A segment of zygomatic arch was resected while the temporal fascia and  
180 muscle were elevated and a craniectomy was performed exposing the local dura mater. The distal  
181 middle cerebral artery (MCA) and associated branches were permanently occluded using bipolar  
182 cautery forceps resulting in ischemic infarction. The temporalis muscle and epidermis were  
183 routinely re-apposed.

184 Anesthesia was discontinued and pigs were returned to their pens upon extubation and  
185 monitored every 15 minutes until vitals including temperature, heart rate, and respiratory rate  
186 returned to normal, every 4 hours for 24 hours, and twice a day thereafter until post-transplantation  
187 sutures were removed. Banamine (2.2 mg/kg IM) was administered for post-operative pain, acute  
188 inflammation, and fever management every 12 hours for the first 24 hours, and every 24 hours for  
189 3 days post-stroke.



## 190 **Magnetic resonance imaging acquisition and analysis**

191 MRI was performed 24 hours post-stroke on a General Electric 3.0 Tesla MRI system. Pigs  
192 were sedated and maintained under anesthesia as previously described for MCAO surgery. MRI  
193 of the cranium was performed using an 8-channel torso coil with the pig positioned in supine  
194 recumbency. Multiplanar MR brain imaging sequences were acquired including T2 Fluid  
195 Attenuated Inversion Recovery (T2FLAIR), T2Weighted (T2W), T2Star (T2\*), DWI, and DTI.  
196 Sequences were analyzed using Osirix software. Cytotoxic edema consistent with ischemic stroke  
197 was confirmed 24 hours post-stroke by comparing corresponding hyperintense regions in  
198 T2FLAIR and DWI sequences and hypointense regions in ADC maps.

199 DWI sequences were used to generate ADC maps. ADC values were calculated for each  
200 axial slice at a manually drawn region of interest (ROI) that was defined by areas of hypointensity  
201 and directly compared to an identical ROI in the contralateral hemisphere. Average ADC values  
202 were obtained by calculating the average signal intensity across all slices and reported as  $10^{-3}$   
203  $\text{mm}^2/\text{s}$ . Hemisphere volume was calculated using T2W sequences for each axial slice by manually  
204 outlining the ipsilateral and contralateral hemispheres. The hemisphere areas were multiplied by  
205 the slice thickness (3mm) to obtain total hemisphere volumes. Lesion volume was calculated using  
206 DWI sequences for each axial slice by manually outlining hyperintense ROIs. The area of each  
207 ROI was multiplied by the slice thickness (2mm) to obtain the total lesion volume. Similarly,  
208 intracranial hemorrhage (ICH) volume was calculated by manually outlining areas of  
209 hypointensity utilizing T2\* sequences. Midline shift (MLS) was calculated utilizing T2W  
210 sequences for each axial slice by measuring the distance from the natural midline along the anterior  
211 and posterior attachments of the falx cerebri to the septum pellucidum. DTI was utilized to generate  
212 FA maps. FA values of the internal capsules were calculated manually on one representative slice

213 per pig and were expressed as a percent change in the ipsilateral hemisphere relative to the  
214 contralateral hemisphere.

## 215 **Blood collection and analysis**

216 Venous blood samples were collected pre-stroke, 4, 12, and 24 hours post-stroke into  
217 K2EDTA spray coated tubes (Patterson Veterinary). 4  $\mu$ L of blood was pipetted onto the base of  
218 a ColorFrost microscope slide (ThermoScientific) approximately 1 cm from the edge. At an angle  
219 of approximately 45 degrees, a spreader slide was placed in front of the blood and retracted until  
220 the blood sample evenly spread along the width of the slide. Even pressure on the spreader slide  
221 was applied in a forward direction in order to create a smear. Care was taken to ensure each blood  
222 smear covered two-thirds of the slide and exhibited an oval feathered end. Each slide was air dried  
223 for 10 minutes, fixed with methanol for 2 minutes, air dried for 2 minutes, and then stained in  
224 Wright-Giemsa stain for 5 minutes. The stained slide was submerged in distilled water (dH<sub>2</sub>O) for  
225 10 minutes. Finally, the slide was rinsed, air dried, and then a cover slip was applied using  
226 Phosphate Buffered Saline (PBS). Trained, blinded personnel completed manual white blood cell  
227 counts of lymphocytes, neutrophils, and band cells at the monolayer, beginning approximately one  
228 millimeter away from the body of the smear. The first 100 white blood cells visualized were  
229 identified and cell counts were expressed as a percentage.

## 230 **Gait analysis**

231 Pigs underwent gait analysis pre-stroke and 48 hours post-stroke to assess changes in  
232 spatiotemporal gait parameters. Data was recorded using a GAITFour<sup>®</sup> electronic, pressure-  
233 sensitive mat (CIR Systems Inc., Franklin, NJ) 7.01 m in length and 0.85 m in width with an  
234 active area that is 6.10 m in length and 0.61 m in width. In this arrangement, the active area is a  
235 grid, 48 sensors wide by 480 sensors long, totaling 23,040 sensors. 2 weeks pre-stroke, pigs were

236 trained to travel across a gait mat at a consistent, 2-beat pace. To reinforce consistency, rewards  
237 were given at each end of the mat for successful runs. Pre-stroke gait data was collected on 3  
238 separate days for each pig. At each time point, pigs were encouraged to move along the mat until  
239 5 consistent trials were collected in which the pigs were not distracted and maintained a  
240 consistent pace with no more than 15 total trials collected.

241 Gait data was semi-automatically analyzed using GAITFour<sup>®</sup> Software to provide  
242 quantitative measurements of velocity (cm/sec) and cadence (steps/min). Additional  
243 measurements were quantified specifically for the affected front left limb, which is contralateral  
244 to the induced stroke lesion on the right side of the brain. These measurements included stride  
245 length (the distance between successive ground contact of the same hoof), swing percent of cycle  
246 (the percent of a full gait cycle in which a limb is not in contact with the ground), cycle time (the  
247 amount of time for a full stride cycle), swing time (the amount of time a limb is in the swing  
248 phase, or not in contact with the ground) and mean pressure (the amount of pressure exerted by a  
249 limb).

## 250 **Open field testing**

251 As an additional measure of functional outcome, pigs underwent open field (OF)  
252 behavior testing pre-stroke and 48 hours post-stroke. All tests took place in a 2.7 m x 2.7 m arena  
253 lined with black rubber matting, used to provide stable footing. White curtains were hung around  
254 the arena to reduce visual distractions during testing. Trials were recorded using EthoVision  
255 video tracking software (Noldus Systems) to obtain objective and quantifiable measures of  
256 behavioral characteristics.

257 Pigs were individually brought to the behavior arena and allowed to explore for 10  
258 minutes during the OF test. Behaviors automatically tracked during this test include velocity and

259 distance traveled. Additionally, exploratory behaviors typical of pigs such as sniffing the wall  
260 (perimeter sniffing) were manually tracked and coded in the EthoVision software by trained  
261 personnel.

## 262 **Statistical analysis**

263 All quantitative data was analyzed with SAS version 9.3 (Cary, NC) and statistical  
264 significances between groups were determined by one-way analysis of variance (ANOVA) and  
265 post-hoc Tukey-Kramer Pair-Wise comparisons. Comparisons where p-values were  $\leq 0.05$  were  
266 considered significantly different.

## 267 **Results**

### 268 **MCAO induces acute ischemic infarction and decreased diffusivity.**

269 To confirm ischemic stroke 24 hours post-MCAO, MRI DWI (Fig 1A) and T2FLAIR  
270 sequences were assessed. Scans exhibited territorial hyperintense lesions characteristic of an  
271 edematous injury. Hypointense lesions observed on corresponding ADC maps (Fig 1B) confirmed  
272 areas of restricted diffusion indicative of cytotoxic edema thus confirming permanent cauterization  
273 of the MCA resulted in ischemic stroke. DWI-ADC mismatch resulted in identification of  
274 potentially salvageable penumbra tissue. DWI sequences revealed an average lesion volume of  
275  $9.91 \pm 1.40 \text{ cm}^3$  (Fig 1A). ADC sequences revealed significantly ( $p \leq 0.0001$ ) decreased diffusivity  
276 within ischemic lesions when compared to identical regions of interest in the contralateral  
277 hemisphere ( $0.34 \pm 0.02$  vs.  $0.62 \pm 0.03 \times 10^{-3} \text{ mm}^2/\text{s}$ , respectively; Fig 1B-C).

### 278 **Ischemic stroke results in acute hemispheric swelling, hemorrhage, 279 and loss of white matter integrity.**

280 Analysis of T2W sequences at 24 hours post-stroke revealed a trending ( $p=0.16$ ) increase  
281 in ipsilateral hemisphere volume indicative of cerebral swelling when compared to the  
282 contralateral hemisphere ( $25.99\pm 1.78$  vs.  $22.49\pm 1.40$   $\text{cm}^3$ , respectively; Fig 2A-C) and an  
283 associated MLS of  $2.48\pm 0.55$  mm (Fig 2A-B). Acute ICH was observed via T2\* sequences with a  
284 consistent mean hemorrhage volume of  $1.73\pm 0.07$   $\text{cm}^3$  (Fig 2D-E, white arrow), which suggests  
285 the ischemic infarct area underwent hemorrhagic transformation (HT). These HTs impacted basal  
286 ganglion structures as well as portions of the cerebellum, brain regions responsible for motor  
287 function. To assess changes in WM integrity, FA values of the internal capsules were evaluated  
288 24 hours post-stroke, revealing a significant ( $p<0.01$ ) decrease in the ipsilateral internal capsule  
289 (IC) when compared to the contralateral side ( $0.17\pm 0.01$  vs.  $0.23\pm 0.01$  respectively; Fig 3A-C).  
290 Collectively, MRI results demonstrated MCAO led to tissue-level damage including ischemic  
291 infarction, decreased diffusivity, hemispheric swelling, pronounced MLS, HT, and disrupted WM  
292 integrity.

### 293 **Ischemic stroke increases circulating neutrophil levels and decreases** 294 **circulating lymphocyte levels.**

295 To determine changes in immune cell response to acute ischemic stroke, venous blood  
296 samples were collected pre-stroke, 4, 12, and 24 hours post-stroke. Band neutrophils (Fig 4A-B),  
297 neutrophils (Fig 4C-D), and lymphocytes (Fig 4E-F) were assessed via manual cell counts. Band  
298 neutrophils significantly ( $p<0.05$ ) increased 12 hours post-stroke compared to pre-stroke  
299 ( $5.50\pm 0.99\%$  vs.  $1.92\pm 0.51\%$  respectively; Fig 4B). Similarly, the number of circulating  
300 neutrophils was significantly ( $p<0.05$ ) increased at 4 and 12 hours post-stroke when compared to  
301 pre-stroke ( $43.7\pm 5.27\%$  and  $48.9\pm 3.92\%$  vs.  $26.5\pm 1.96\%$ , respectively; Fig 4D). The number of  
302 circulating lymphocytes was significantly ( $p<0.05$ ) decreased at 12 and 24 hours post-stroke

303 compared to pre-stroke ( $25.60 \pm 4.01\%$  and  $26.60 \pm 4.29\%$  vs.  $44.83 \pm 3.66\%$  respectively; Fig 4F).  
304 These results demonstrated stroke resulted in an increase in circulating band neutrophils and  
305 neutrophils and a decrease in circulating lymphocytes which indicates an acute immune  
306 response.

### 307 **Ischemic stroke decreases exploratory behaviors during open field** 308 **testing.**

309 Changes in exploratory behaviors were assessed using the open field (OF) test 48 hours  
310 post-stroke. Perimeter sniffing, a typical exploratory behavior exhibited by pigs, was recorded  
311 utilizing Ethovision XT tracking software to assess differences in perimeter sniffing pre- and  
312 post-stroke (Fig 5A-B); representative 10 minute movement tracings show perimeter sniffing  
313 (red) and non-perimeter sniffing (yellow). Pigs' perimeter sniffing frequency significantly  
314 ( $p < 0.05$ ) decreased 48 hours post-stroke compared to pre-stroke ( $13 \pm 2.94$  vs  $26 \pm 4.02$  times,  
315 respectively, Fig 5C). However, no significant differences were noted for velocity and distance  
316 traveled in the OF test between pre- and 48 hours post-stroke. These results suggest that stroke  
317 impairs normal exploratory behaviors.

### 318 **Ischemic stroke results in spatiotemporal gait deficits.**

319 Key spatiotemporal gait parameters were analyzed pre-stroke and 48 hours post-stroke to  
320 detect potential impairments in motor function as an outcome of stroke. Significant ( $p < 0.01$ )  
321 decreases were noted in the average velocity and cadence at 48 hours post-stroke compared to  
322 pre-stroke indicating the speed of the pigs decreased as a result of stroke ( $61.01 \pm 8.39$  vs  
323  $162.9 \pm 12.73$  cm/s and  $61.01 \pm 5.91$  vs  $126.44 \pm 3.72$  steps/min, respectively, Fig 6A-B). Further  
324 changes were noted in measurements of the contralateral left forelimb (LF). The limb

325 contralateral to the stroke lesion typically has more pronounced motor deficits relative to the  
326 ipsilateral limb in humans, mice, and rats (68, 69). The swing percent of cycle significantly  
327 ( $p<0.01$ ) decreased demonstrating pigs spent more time with the LF in contact with the ground at  
328 48 hours post-stroke compared to pre-stroke suggesting an increased need for support  
329 ( $30.70\pm 2.12$  vs  $48.89\pm 2.35\%$ , respectively, Fig 6C). A significant ( $p<0.01$ ) decrease in stride  
330 length of the LF was observed at 48 hours post-stroke compared to pre-stroke ( $59.04\pm 3.85$ cm vs  
331  $76.72\pm 4.60$ cm, respectively, Fig 6D). Cycle time of the LF significantly ( $p<0.01$ ) increased  
332 signifying a slower gait at 48 hours post-stroke compared to pre-stroke ( $1.02\pm 0.09$  vs  
333  $0.48\pm 0.013$ sec, respectively, Fig 6E). Finally, the mean pressure exhibited by the LF  
334 significantly ( $p<0.01$ ) decreased at 48 hours post-stroke compared to pre-stroke ( $2.62\pm 0.03$  vs  
335  $2.82\pm 0.03$  arbitrary units (AU), respectively, Fig 6F). Deficits in the measured gait parameters  
336 indicate stroke lead to substantial motor impairments at acute time points in pigs.

## 337 **Discussion**

338 In this study, we observed and characterized acute stroke injury severity, prognostic  
339 biomarkers, and potential therapeutic targets utilizing clinically relevant MRI, immune, behavior,  
340 and motor function tests in the translational ischemic stroke pig model. Lesion volumes were  
341 consistent among pigs and closely replicated human lesion volumes with similar impairments in  
342 functional performance (70-73). Ischemic injury produced cerebral swelling and consequent MLS  
343 as well as notable ICH, all of which are strongly associated with stroke patient morbidity (39, 74,  
344 75). In addition, stroke led to reduced WM integrity of the IC correlating with a contralateral  
345 deteriorations in motor function commonly seen in patients post-stroke (30, 76, 77). Also similar  
346 to human stroke patients, MCAO led to an acute immune response marked by an increase in

347 circulating neutrophils and a corresponding decrease in circulating lymphocytes which is a key  
348 biomarker for identifying ischemic stroke patients at risk for the development of intracranial  
349 hemorrhage thus influencing the use of tPA (78-80). Functional assessments showed impaired  
350 behavior and motor function disruptions that affected both spatiotemporal parameters and weight  
351 distribution, all of which parallel clinical functional outcomes in stroke patients (81-83). By further  
352 understanding these physiological hallmarks and exploiting the similarities between pigs and  
353 humans, the ischemic stroke pig model can be utilized to decrease the translational gap between  
354 rodent models and human stroke patients.

355 Early detection of ischemic infarction via DWI analysis has proven to be a critical  
356 component for both prognosis and therapeutic potentials within the narrow treatment window of  
357 acute ischemic stroke (84-86). This study showed mean lesion volumes of  $9.91 \pm 3.14 \text{ cm}^3$  at 24  
358 hours post-stroke. Given that pig brains are approximately 7.5 times smaller than human brains,  
359 lesion volumes were found to closely replicate patient DWI lesion volumes. Acute DWI lesion  
360 thresholds of  $72 \text{ cm}^3$  are common in patients with major cerebral artery occlusions (26, 87-90).  
361 Often pre-clinical stroke models have relied on T1 or T2 MRI sequences which are typically  
362 delayed in early recognition of cerebral ischemia and do not account for diffusion abnormalities  
363 that may evolve into infarction (91-93). DWI lesion measurements overcome this limitation.  
364 Common pathological features of human ischemic infarction were also observed in our model  
365 including significant restricted diffusion in focal regions spanning the parietal, limbic, and  
366 temporal lobes as indicated by ADC maps (85, 94-96). Specifically, our pig model replicates  
367 characteristics of human MCA stroke by primarily demonstrating cytotoxic edema which will later  
368 evolve into vasogenic edema. In some pre-clinical stroke models, including rodent photochemical  
369 and photothrombotic models, cytotoxic edema and vasogenic edema develop simultaneously



370 resulting in ischemic lesions lacking a penumbra (97, 98). This is a major model limitation as the  
371 penumbra is considered potentially salvagable tissue in human patients and is a coveted therapeutic  
372 intervention target. MRI-based discrimination of core from penumbra and non-ischemic tissue  
373 provides critical information for the testing of neuroprotective and restorative treatments as well  
374 as the initiation of surgical interventions within acute and sub-acute treatment windows (99, 100).  
375 For example, ischemic core volumes distinguishable from penumbra enable clinicians to consider  
376 the risk of cerebral hemorrhage from acute revascularization therapy (101). For these reasons,  
377 evaluating the efficacy and safety of potential treatments in an animal model with similar  
378 pathophysiology of acute ischemia in terms of cytotoxic and vasogenic edema as humans is of  
379 significant value.

380 Cerebral edema and consequent hemispheric swelling are serious stroke complications that  
381 result in rapid neurological deterioration and a disproportionately high 30-day patient mortality  
382 rate of 60-80% (102-104). Crudely managed via osmotic diuretics and/or decompressive  
383 craniectomies, patients are in desperate need for more effective and less invasive  
384 pharmacotherapies (105-107). These needs have been met with poor therapeutic translation due to  
385 discrepancies in lissencephalic small animal stroke models including limited cerebral edema and  
386 swelling as well as variable MLS and mortality rates (108-110). Specifically in endothelin-1 (ET-  
387 1) rodent stroke models, animals exhibit a dose-dependent ischemic lesion with marginal ischemic  
388 edema making this model less suited for studying acute stroke pathophysiology (111-114). In  
389 contrast, our pig stroke model exhibited increased ipsilateral hemisphere swelling due to the  
390 development of cytotoxic edema and consequent MLS within 24 hours post-stroke. These  
391 observations are in keeping with other large animal models of stroke, in which permanent ovine  
392 MCAO demonstrated cerebral edema and MLS (115). These physiological responses post-

393 ischemic stroke are frequently associated with different levels of consciousness and serve as a  
394 predictive indicator of patient prognosis (116, 117). Furthermore, clinical studies indicate  
395 quantification of MLS can predict cerebral herniations and subsequent death prior to clinical signs  
396 and are a clinically relevant feature of this pig stroke model (118).

397         Although MRI techniques have become increasingly valuable in characterizing and  
398 refining the field's understanding of ICH, the time course and underlying mechanisms remain  
399 poorly understood due to variability in the onset, size, and location of ICH in current stroke animal  
400 models (119). Often resulting from hemorrhagic transformation (HT) in ischemic stroke patients,  
401 spontaneous ICH incidence ranges from 38-71% in autopsy studies and from 13-43% in CT studies  
402 (120, 121). Furthermore, when ICH occupies >30% of the infarct zone, it has been correlated with  
403 early neurological deterioration and a significant increase in mortality rates 90 days post-ischemic  
404 stroke (122, 123). T2\* sequences showed consistent mean hemorrhage volume between stroke  
405 pigs, indicating MCAO caused loss of macro- and microvessel integrity. The classical clinical  
406 presentations of ICH were replicated in our model through the progression of neurological deficits  
407 within hours post-stroke including decreased consciousness, head-pressing, vomiting, facial  
408 paralysis, and limb weakness (120, 124, 125). Interestingly, these neurological deficits correlated  
409 with the location of ICH. For example, ICH in the cerebellum was associated with ataxia whereas  
410 ICH in basal ganglia structures were associated with limb weakness. In previous studies, early  
411 neurologic deterioration was attributed primarily to cerebral edema and lesion volume; however,  
412 recent clinical pathological, MR, and CT studies suggest hemorrhage into ischemic tissues is a  
413 major contributor to poor clinical outcome, making ICH a novel target of pre-clinical studies (126-  
414 129). By replicating both tissue-level and neurological presentations unique to ICH, our model  
415 presents an exciting new platform for testing hemostatic therapies and surgical interventions.

416 For the first time, it was observed MCAO led to reduced WM integrity in the IC 24 hours  
417 post-stroke in the pig model. This subcortical structure is highly involved in communication  
418 between the cerebral cortex and brainstem resulting in profound muscle weakness and inhibited  
419 perception of sensory information of the patient's face, arm, trunk, and leg post-stroke (130).  
420 Studies using Functional Ambulatory Categories found patients with IC lesions experience  
421 persistent (>6 months) functional motor deficits; requiring aids for balance and support during  
422 ambulation (131). As the right IC transmits nerve signals for movement of the left side of the body,  
423 our pig MCAO model closely replicated post-stroke deficits as seen through a decrease in  
424 spatiotemporal gait parameters of the hemiplegic limb including LF stride length and LF swing  
425 percent of cycle. Similarly, stroke patients exhibit decreases in the duration of stride length and  
426 the swing phase in the hemiplegic limb (132-135). Mean pressure of the LF limb was also  
427 decreased in stroke pigs likely as a result of overall greater weakness of the hemiplegic limb (136).  
428 Stroke pigs compensated for limb weakness and balance impairments by taking shorter, slower  
429 steps, thus reducing their velocity and cadence to better stabilize their gait. In a comparable human  
430 study utilizing the analogous GAITRite system, WM lesions corresponded with a poorer gait score  
431 as measured by step length and abnormal cadence in patients (77). These manifestations support  
432 our previous studies evaluating functional deficits post-stroke, thus providing further evidence  
433 quantitative gait analysis is a critical tool for the evaluation of stroke severity and therapeutic  
434 impact on recovery (25, 137).

435 Immune and inflammatory responses have been shown to play a key role in the sequela of  
436 ischemic stroke (138). Within the first few hours after stroke, neutrophils are recruited to the site  
437 of injury and release cytokines, chemokines, free oxygen radicals, and other inflammatory  
438 mediators (139). In this study, we observed a significant increase in neutrophils at 4 and 12 hours

439 post-stroke. Neutrophil release of inflammatory mediators has been directly associated with cell  
440 damage or death as well as damage to the vasculature and extracellular matrices (139). Neutrophils  
441 have been implicated to play a significant role in blood brain barrier disruption and HT following  
442 ischemic stroke, which may explain one potential mechanism for HT observed 24 hours post-  
443 stroke in this study (79). Conversely, acute ischemic stroke has been shown to induce a rapid and  
444 long-lasting suppression of circulating immune cells such as lymphocytes that can lead to  
445 increased susceptibility of systemic infections after stroke (140). In this study, we observed a  
446 significant decrease in lymphocytes at 12 and 24 hours post-stroke, consistent with reports that  
447 stroke in humans induces immediate loss of lymphocytes that is most pronounced at 12 hours post-  
448 stroke (141). Though the exact mechanisms by which lymphocytes mediate immunosuppression  
449 post-stroke remain unclear, clinical evidence supports that lower levels of lymphocytes are a sign  
450 of poor long-term functional outcome (142-144). The neutrophil-to-lymphocyte ratio (NLR) was  
451 determined to be a useful marker to predict neurological deterioration and short-term mortality in  
452 patients with acute ischemic stroke (145, 146). Elevated NLRs have been reported to be associated  
453 with chronic inflammation, poor functional prognosis, and larger lesion volumes in ischemic  
454 stroke patients (78, 139, 146-148). These results suggest that neutrophil recruitment in our pig  
455 model may play a significant role in inflammatory-mediated secondary injury processes that  
456 contribute to the development of functional impairments. Furthermore, similar to human stroke  
457 patients, neutrophil and lymphocyte levels in our pig model may also serve as ideal markers for  
458 stroke severity and outcome prediction.

459         Open field testing is regularly used to evaluate behavior in rodents after ischemic stroke  
460 (149), specifically as an indicator of changes in exploratory behaviors (150, 151). In this study, a  
461 significant decrease was noted in perimeter sniffing frequency post-stroke in open field testing.

462 Pigs are inherently exploratory animals and perimeter sniffing is a typical exploratory behavior  
463 (152). This change in behavior may be attributed to post-stroke depression (PSD) as this behavioral  
464 disturbance has been reported to commonly develop in humans in the acute post-stroke period  
465 (153, 154). In accordance with the behavioral changes noted in the present study, PSD in humans  
466 is characterized by general apathy and lack of interest (155, 156). Evaluation and understanding  
467 of behavioral changes in a translational, large animal stroke model is crucial for future studies to  
468 assess functional outcomes of potential therapies.

469 In this study, we have demonstrated our pig model of ischemic stroke positively replicates  
470 cellular, tissue, and functional outcomes at acute time points similar to human stroke patients.  
471 MCAO in our pig ischemic stroke model exhibited a multifactorial effect leading to cytotoxic  
472 edema, lesioning, hemispheric swelling, and ICH, while also impairing diffusivity and WM  
473 integrity. These structural changes correlated with behavioral and motor function deficits in a  
474 similar manner to acute human stroke patients. As an effective model of acute ischemic stroke  
475 pathophysiology, the pig system is potentially an excellent tool for identifying potential treatment  
476 targets and testing novel therapeutics and diagnostics.

## 477 **Acknowledgements**

478 The authors would like to thank Brandy Winkler and our team of undergraduate researchers  
479 who were involved in various aspects of surgeries, post-operative care, pig gait/behavioral testing,  
480 and data analysis. We would also like to thank the University of Georgia Animal Resources team  
481 for veterinary care and guidance as well as Rick Utley and Kelly Parham for their pig expertise  
482 and management skills.

## 483 **Funding**

484 This work was supported by the National Institute of Neurological Disorders and Stroke  
485 [grant number R01NS093314].

## 486 **Declarations of interest**

487 We have no declarations of interest to report.

## 488 **Figure legends**

489 **Figure 1: MCAO induces acute ischemic infarction and decreased**  
490 **diffusivity.** DWI sequences exhibited territorial hyperintense lesions of  $9.91 \pm 1.40 \text{ cm}^3$   
491 characteristic of an edematous injury (A, white arrow). ADC maps revealed signal void indicative  
492 of restricted diffusion and cytotoxic edema (B, white arrow). Ipsilateral ROIs exhibited a  
493 significantly ( $p \leq 0.0001$ ) lower ADC value relative to the contralateral hemisphere ( $0.34 \pm 0.02$  vs.  
494  $0.62 \pm 0.03 \times 10^{-3} \text{ mm}^2/\text{s}$ , respectively; C). \* indicates significant difference between hemispheres.

495 **Figure 2: Ischemic stroke results in hemispheric swelling, consequent**  
496 **midline shift, and intracranial hemorrhage.** T2W sequences revealed increased  
497 swelling of the ipsilateral hemisphere ( $25.99 \pm 1.78$  vs.  $22.49 \pm 1.40 \text{ cm}^3$ ; A-C) resulting in a  
498 pronounced MLS of  $2.48 \pm 0.55 \text{ mm}$  compared to pre-stroke imaging (A and B, red lines).  
499 Characteristic hypointense ROIs indicated the presence of ipsilateral ICH when compared to pre-  
500 stroke T2\* sequences ( $1.73 \pm 0.17 \text{ cm}^3$ , D and E, white arrow).

501 **Figure 3: Ischemic stroke diminishes white matter integrity of the**  
502 **internal capsule.** Pre-stroke the left and right IC possess similar WM integrity (A). 24 hours  
503 post-stroke, the ipsilateral IC exhibited a disruption in WM integrity (B, white arrow). Further

504 analysis revealed a significant ( $p < 0.01$ ) decrease in the ipsilateral IC FA value when compared to  
505 the contralateral IC ( $0.17 \pm 0.01$  vs.  $0.23 \pm 0.01$  respectively; C). \* indicates significant difference  
506 between hemispheres.

507 **Figure 4: Ischemic stroke leads to increases in circulating neutrophil**

508 **levels and decreases in circulating lymphocyte levels.** Band neutrophils

509 showed a significant ( $p < 0.05$ ) increase 12 hours post-stroke when compared to pre-stroke  
510 ( $5.50 \pm 0.99$  vs.  $1.92 \pm 0.51\%$  respectively; A, B). Circulating neutrophils were significantly  
511 ( $p < 0.05$ ) increased at 4 and 12 hours post-stroke relative to pre-stroke ( $43.7 \pm 5.27$  and  $48.9 \pm 3.92\%$   
512 vs.  $26.5 \pm 1.96\%$ , respectively; C, D). Circulating lymphocytes were significantly ( $p < 0.05$ )  
513 decreased at 12 and 24 hours post-stroke compared to pre-stroke ( $25.60 \pm 4.01$  and  $26.60 \pm 4.29\%$   
514 vs.  $44.83 \pm 3.66\%$  respectively; E, F). \* indicates significant difference between pre-stroke and  
515 post-stroke time points.

516 **Figure 5: MCAO leads to functional disabilities and behavioral**

517 **abnormalities.** Ethovision XT tracking software was used during OF testing to automatically

518 assess differences in perimeter sniffing (red line) versus OF arena exploration (yellow line) pre-  
519 stroke (A) and post-stroke (B). Exploratory perimeter sniffing frequencies were significantly  
520 ( $p < 0.05$ ) reduced at 48 hours post-stroke compared to pre-stroke observations ( $13.0 \pm 2.94$  vs  
521  $26.0 \pm 4.02$ , respectively; C). \* indicates a significant difference from pre-stroke.

522 **Figure 6: Ischemic stroke results in spatiotemporal gait deficits.**

523 Velocity and cadence significantly ( $p < 0.01$ ) decreased post-stroke ( $61.01 \pm 8.39$  vs  $162.9 \pm 12.73$   
524 cm/s and  $61.01 \pm 5.91$  vs  $126.44 \pm 3.72$  steps/min, respectively, A-B). The LF swing percent of cycle  
525 significantly ( $p < 0.01$ ) decreased compared to pre-stroke ( $30.70 \pm 2.12$  vs  $48.89 \pm 2.35\%$ ,

526 respectively, C). A significant ( $p<0.01$ ) decrease in LF stride length was observed post-stroke  
527 compared to pre-stroke ( $59.04\pm 3.85$  vs  $76.72\pm 4.60$ cm, respectively, D). LF cycle time  
528 significantly ( $p<0.01$ ) increased relative to pre-stroke ( $1.02\pm 0.09$  vs  $0.48\pm 0.013$ sec, respectively,  
529 E). The mean pressure exhibited by the LF significantly ( $p<0.01$ ) decreased at post-stroke  
530 compared to pre-stroke ( $2.62\pm 0.03$  vs  $2.82\pm 0.03$  arbitrary units (A.U.), respectively, F). \* indicates  
531 significant difference between pre-stroke and post-stroke time points.

## 532 **References**

- 533 1. WHO publishes definitive atlas on global heart disease and stroke epidemic. *Indian J Med Sci.*  
534 2004;58(9):405-6.
- 535 2. Greenlund KJ, Croft JB, Mensah GA. Prevalence of heart disease and stroke risk factors in persons with  
536 prehypertension in the United States, 1999-2000. *Arch Intern Med.* 2004;164(19):2113-8.
- 537 3. Organization WH. Global status report on noncommunicable diseases 2010. 2010:176.
- 538 4. Cheng NT, Kim AS. Intravenous Thrombolysis for Acute Ischemic Stroke Within 3 Hours Versus Between  
539 3 and 4.5 Hours of Symptom Onset. *The Neurohospitalist.* 2015;5(3):101-9.
- 540 5. Boyle K, Joundi RA, Aviv RI. An historical and contemporary review of endovascular therapy for acute  
541 ischemic stroke. *Neurovascular Imaging.* 2017;3(1):1.
- 542 6. Saver JL, Albers GW, Dunn B, Johnston KC, Fisher M, Consortium SV. Stroke Therapy Academic  
543 Industry Roundtable (STAIR) recommendations for extended window acute stroke therapy trials. *Stroke.*  
544 2009;40(7):2594-600.
- 545 7. Barber PA, Darby DG, Desmond PM, Yang Q, Gerraty RP, Jolley D, et al. Prediction of stroke outcome  
546 with echoplanar perfusion- and diffusion-weighted MRI. *Neurology.* 1998;51(2):418-26.
- 547 8. Vilela P, Rowley HA. Brain ischemia: CT and MRI techniques in acute ischemic stroke. *Eur J Radiol.*  
548 2017;96:162-72.
- 549 9. Attye A, Boncoeur-Martel MP, Maubon A, Mounayer C, Couratier P, Labrunie A, et al. [Diffusion-  
550 Weighted Imaging infarct volume and neurologic outcomes after ischemic stroke]. *J Neuroradiol.* 2012;39(2):97-  
551 103.



- 552 10. Beaulieu C. The basis of anisotropic water diffusion in the nervous system - a technical review. *NMR*  
553 *Biomed.* 2002;15(7-8):435-55.
- 554 11. Sotak CH. The role of diffusion tensor imaging in the evaluation of ischemic brain injury - a review. *NMR*  
555 *Biomed.* 2002;15(7-8):561-9.
- 556 12. Mousavi SA, Saadatnia M, Khorvash F, Hoseini T, Sariaslani P. Evaluation of the neuroprotective effect of  
557 dextromethorphan in the acute phase of ischaemic stroke. *Archives of medical science : AMS.* 2011;7(3):465-9.
- 558 13. Diener HC, Cortens M, Ford G, Grotta J, Hacke W, Kaste M, et al. Lubeluzole in acute ischemic stroke  
559 treatment: A double-blind study with an 8-hour inclusion window comparing a 10-mg daily dose of lubeluzole with  
560 placebo. *Stroke.* 2000;31(11):2543-51.
- 561 14. Diener HC, Lees KR, Lyden P, Grotta J, Davalos A, Davis SM, et al. NXY-059 for the treatment of acute  
562 stroke: pooled analysis of the SAINT I and II Trials. *Stroke.* 2008;39(6):1751-8.
- 563 15. Clark WM, Wechsler LR, Sabounjian LA, Schwiderski UE, Citicoline Stroke Study G. A phase III  
564 randomized efficacy trial of 2000 mg citicoline in acute ischemic stroke patients. *Neurology.* 2001;57(9):1595-602.
- 565 16. Stem Cell Therapies as an Emerging Paradigm in Stroke P. Stem Cell Therapies as an Emerging Paradigm  
566 in Stroke (STEPS): bridging basic and clinical science for cellular and neurogenic factor therapy in treating stroke.  
567 *Stroke.* 2009;40(2):510-5.
- 568 17. Savitz SI, Chopp M, Deans R, Carmichael T, Phinney D, Wechsler L, et al. Stem Cell Therapy as an  
569 Emerging Paradigm for Stroke (STEPS) II. *Stroke.* 2011;42(3):825-9.
- 570 18. Fisher M, Hanley DF, Howard G, Jauch EC, Warach S, Group S. Recommendations from the STAIR V  
571 meeting on acute stroke trials, technology and outcomes. *Stroke.* 2007;38(2):245-8.
- 572 19. Fisher M, Feuerstein G, Howells DW, Hurn PD, Kent TA, Savitz SI, et al. Update of the stroke therapy  
573 academic industry roundtable preclinical recommendations. *Stroke.* 2009;40(6):2244-50.
- 574 20. Fisher M, Stroke Therapy Academic Industry R. Recommendations for advancing development of acute  
575 stroke therapies: Stroke Therapy Academic Industry Roundtable 3. *Stroke.* 2003;34(6):1539-46.
- 576 21. Albers GW, Goldstein LB, Hess DC, Wechsler LR, Furie KL, Gorelick PB, et al. Stroke Treatment  
577 Academic Industry Roundtable (STAIR) recommendations for maximizing the use of intravenous thrombolytics and  
578 expanding treatment options with intra-arterial and neuroprotective therapies. *Stroke.* 2011;42(9):2645-50.

- 579 22. Duberstein KJ, Platt SR, Holmes SP, Dove CR, Howerth EW, Kent M, et al. Gait analysis in a pre- and  
580 post-ischemic stroke biomedical pig model. *Physiology & Behavior*. 2014;125:8-16.
- 581 23. Baker EW, Platt SR, Lau VW, Grace HE, Holmes SP, Wang L, et al. Induced Pluripotent Stem Cell-  
582 Derived Neural Stem Cell Therapy Enhances Recovery in an Ischemic Stroke Pig Model. *Sci Rep*. 2017;7(1):10075.
- 583 24. Platt SR, Holmes SP, Howerth EW, Duberstein KJ, Dove CR, Kinder HA, et al. Development and  
584 characterization of a Yucatan miniature biomedical pig permanent middle cerebral artery occlusion stroke model.  
585 *Exp Transl Stroke Med*. 2014;6(1):5.
- 586 25. Webb RL, Kaiser EE, Jurgielewicz BJ, Spellicy S, Scoville SL, Thompson TA, et al. Human Neural Stem  
587 Cell Extracellular Vesicles Improve Recovery in a Porcine Model of Ischemic Stroke. *Stroke*. 2018;49(5):1248-56.
- 588 26. Lind NM, Moustgaard A, Jelsing J, Vajta G, Cumming P, Hansen AK. The use of pigs in neuroscience:  
589 modeling brain disorders. *Neurosci Biobehav Rev*. 2007;31(5):728-51.
- 590 27. Nakamura M, Imai H, Konno K, Kubota C, Seki K, Puentes S, et al. Experimental investigation of  
591 encephalomyosynangiosis using gyrencephalic brain of the miniature pig: histopathological evaluation of dynamic  
592 reconstruction of vessels for functional anastomosis. Laboratory investigation. *J Neurosurg Pediatr*. 2009;3(6):488-  
593 95.
- 594 28. Kuluz JW, Prado R, He D, Zhao W, Dietrich WD, Watson B. New pediatric model of ischemic stroke in  
595 infant piglets by photothrombosis: acute changes in cerebral blood flow, microvasculature, and early histopathology.  
596 *Stroke*. 2007;38(6):1932-7.
- 597 29. Tanaka Y, Imai H, Konno K, Miyagishima T, Kubota C, Puentes S, et al. Experimental model of lacunar  
598 infarction in the gyrencephalic brain of the miniature pig: neurological assessment and histological,  
599 immunohistochemical, and physiological evaluation of dynamic corticospinal tract deformation. *Stroke*.  
600 2008;39(1):205-12.
- 601 30. Baltan S, Besancon EF, Mbow B, Ye Z, Hamner MA, Ransom BR. White matter vulnerability to ischemic  
602 injury increases with age because of enhanced excitotoxicity. *J Neurosci*. 2008;28(6):1479-89.
- 603 31. Dewar D, Yam P, McCulloch J. Drug development for stroke: importance of protecting cerebral white  
604 matter. *Eur J Pharmacol*. 1999;375(1-3):41-50.
- 605 32. Rudkin S, Cerejo R, Tayal A, Goldberg MF. Imaging of acute ischemic stroke. *Emerg Radiol*.  
606 2018;25(6):659-72.

- 607 33. Warach S, Gaa J, Siewert B, Wielopolski P, Edelman RR. Acute human stroke studied by whole brain echo  
608 planar diffusion-weighted magnetic resonance imaging. *Ann Neurol.* 1995;37(2):231-41.
- 609 34. Warach S, Chien D, Li W, Ronthal M, Edelman RR. Fast magnetic resonance diffusion-weighted imaging  
610 of acute human stroke. *Neurology.* 1992;42(9):1717-23.
- 611 35. Lutsep HL, Albers GW, DeCrespigny A, Kamat GN, Marks MP, Moseley ME. Clinical utility of diffusion-  
612 weighted magnetic resonance imaging in the assessment of ischemic stroke. *Ann Neurol.* 1997;41(5):574-80.
- 613 36. Lovblad KO, Laubach HJ, Baird AE, Curtin F, Schlaug G, Edelman RR, et al. Clinical experience with  
614 diffusion-weighted MR in patients with acute stroke. *AJNR Am J Neuroradiol.* 1998;19(6):1061-6.
- 615 37. Lee LJ, Kidwell CS, Alger J, Starkman S, Saver JL. Impact on stroke subtype diagnosis of early diffusion-  
616 weighted magnetic resonance imaging and magnetic resonance angiography. *Stroke.* 2000;31(5):1081-9.
- 617 38. Barber PA, Darby DG, Desmond PM, Gerraty RP, Yang Q, Li T, et al. Identification of major ischemic  
618 change. Diffusion-weighted imaging versus computed tomography. *Stroke.* 1999;30(10):2059-65.
- 619 39. Lovblad KO, Baird AE, Schlaug G, Benfield A, Siewert B, Voetsch B, et al. Ischemic lesion volumes in  
620 acute stroke by diffusion-weighted magnetic resonance imaging correlate with clinical outcome. *Ann Neurol.*  
621 1997;42(2):164-70.
- 622 40. Tong DC, Yenari MA, Albers GW, O'Brien M, Marks MP, Moseley ME. Correlation of perfusion- and  
623 diffusion-weighted MRI with NIHSS score in acute (<6.5 hour) ischemic stroke. *Neurology.* 1998;50(4):864-70.
- 624 41. Lansberg MG, Thijs VN, O'Brien MW, Ali JO, de Crespigny AJ, Tong DC, et al. Evolution of apparent  
625 diffusion coefficient, diffusion-weighted, and T2-weighted signal intensity of acute stroke. *AJNR Am J Neuroradiol.*  
626 2001;22(4):637-44.
- 627 42. Moseley ME, Cohen Y, Mintorovitch J, Chileuitt L, Shimizu H, Kucharczyk J, et al. Early detection of  
628 regional cerebral ischemia in cats: comparison of diffusion- and T2-weighted MRI and spectroscopy. *Magn Reson*  
629 *Med.* 1990;14(2):330-46.
- 630 43. Rordorf G, Koroshetz WJ, Copen WA, Cramer SC, Schaefer PW, Budzik RF, Jr., et al. Regional ischemia  
631 and ischemic injury in patients with acute middle cerebral artery stroke as defined by early diffusion-weighted and  
632 perfusion-weighted MRI. *Stroke.* 1998;29(5):939-43.
- 633 44. D'Olhaberriague L, Welch KM, Nagesh V, Gymnopoulos C, Mansbach HH, Hugg JW, et al. Preliminary  
634 clinical-radiological assessment of a MR tissue signature model in human stroke. *J Neurol Sci.* 1998;156(2):158-66.

- 635 45. Etherton MR, Wu O, Giese AK, Lauer A, Boulouis G, Mills B, et al. White Matter Integrity and Early  
636 Outcomes After Acute Ischemic Stroke. *Transl Stroke Res*. 2019.
- 637 46. Liu G, Dang C, Chen X, Xing S, Dani K, Xie C, et al. Structural remodeling of white matter in the  
638 contralesional hemisphere is correlated with early motor recovery in patients with subcortical infarction. *Restor*  
639 *Neurol Neurosci*. 2015;33(3):309-19.
- 640 47. Wang Y, Liu G, Hong D, Chen F, Ji X, Cao G. White matter injury in ischemic stroke. *Prog Neurobiol*.  
641 2016;141:45-60.
- 642 48. Olavarria VV, Brunser A, Cabral N, Martins S, Munoz-Venturelli P, Cavada G, et al. The distribution of  
643 the modified Rankin scale scores change according to eligibility criteria in acute ischemic stroke trials: A  
644 consideration for sample size calculations when using ordinal regression analysis. *Contemp Clin Trials Commun*.  
645 2017;5:133-6.
- 646 49. Martinaud O, Pouliquen D, Gerardin E, Loubeyre M, Hirsbein D, Hannequin D, et al. Visual agnosia and  
647 posterior cerebral artery infarcts: an anatomical-clinical study. *PLoS One*. 2012;7(1):e30433.
- 648 50. Capitani E, Laiacona M, Pagani R, Capasso R, Zampetti P, Miceli G. Posterior cerebral artery infarcts and  
649 semantic category dissociations: a study of 28 patients. *Brain*. 2009;132(Pt 4):965-81.
- 650 51. Park KC, Yoon SS, Rhee HY. Executive dysfunction associated with stroke in the posterior cerebral artery  
651 territory. *J Clin Neurosci*. 2011;18(2):203-8.
- 652 52. Weimar C, Mieck T, Buchthal J, Ehrenfeld CE, Schmid E, Diener HC, et al. Neurologic worsening during  
653 the acute phase of ischemic stroke. *Arch Neurol*. 2005;62(3):393-7.
- 654 53. Michael KM, Allen JK, Macko RF. Reduced ambulatory activity after stroke: the role of balance, gait, and  
655 cardiovascular fitness. *Arch Phys Med Rehabil*. 2005;86(8):1552-6.
- 656 54. Raghavan P. Upper Limb Motor Impairment After Stroke. *Phys Med Rehabil Clin N Am*. 2015;26(4):599-  
657 610.
- 658 55. Nascimento LR, de Oliveira CQ, Ada L, Michaelsen SM, Teixeira-Salmela LF. Walking training with  
659 cueing of cadence improves walking speed and stride length after stroke more than walking training alone: a  
660 systematic review. *J Physiother*. 2015;61(1):10-5.
- 661 56. Hak L, Houdijk H, van der Wurff P, Prins MR, Beek PJ, van Dieen JH. Stride frequency and length  
662 adjustment in post-stroke individuals: influence on the margins of stability. *J Rehabil Med*. 2015;47(2):126-32.

- 663 57. Peterson CL, Hall AL, Kautz SA, Neptune RR. Pre-swing deficits in forward propulsion, swing initiation  
664 and power generation by individual muscles during hemiparetic walking. *J Biomech.* 2010;43(12):2348-55.
- 665 58. Nolan KJ, Yarossi M, McLaughlin P. Changes in center of pressure displacement with the use of a foot  
666 drop stimulator in individuals with stroke. *Clin Biomech (Bristol, Avon).* 2015;30(7):755-61.
- 667 59. De Nunzio A, Zucchella C, Spicciato F, Tortola P, Vecchione C, Pierelli F, et al. Biofeedback rehabilitation  
668 of posture and weightbearing distribution in stroke: a center of foot pressure analysis. *Funct Neurol.* 2014;29(2):127-  
669 34.
- 670 60. Villa RF, Ferrari F, Moretti A. Post-stroke depression: Mechanisms and pharmacological treatment.  
671 *Pharmacol Ther.* 2018;184:131-44.
- 672 61. Ayerbe L, Ayis S, Crichton S, Wolfe CD, Rudd AG. The long-term outcomes of depression up to 10 years  
673 after stroke; the South London Stroke Register. *J Neurol Neurosurg Psychiatry.* 2014;85(5):514-21.
- 674 62. De Ryck A, Brouns R, Franssen E, Geurden M, Van Gestel G, Wilssens I, et al. A prospective study on the  
675 prevalence and risk factors of poststroke depression. *Cerebrovasc Dis Extra.* 2013;3(1):1-13.
- 676 63. Sauleau P, Lapouble E, Val-Laillet D, Malbert CH. The pig model in brain imaging and neurosurgery.  
677 *Animal.* 2009;3(8):1138-51.
- 678 64. Craner SL, Ray RH. Somatosensory cortex of the neonatal pig: I. Topographic organization of the primary  
679 somatosensory cortex (SI). *J Comp Neurol.* 1991;306(1):24-38.
- 680 65. Craner SL, Ray RH. Somatosensory cortex of the neonatal pig: II. Topographic organization of the  
681 secondary somatosensory cortex (SII). *J Comp Neurol.* 1991;306(1):39-48.
- 682 66. Lapchak PA, Zhang JH, Noble-Haeusslein LJ. RIGOR guidelines: escalating STAIR and STEPS for  
683 effective translational research. *Translational stroke research.* 2013;4(3):279-85.
- 684 67. Baker EW, Platt SR, Lau VW, Grace HE, Holmes SP, Wang L, et al. Induced Pluripotent Stem Cell-  
685 Derived Neural Stem Cell Therapy Enhances Recovery in an Ischemic Stroke Pig Model. *Scientific Reports.*  
686 2017;7(1):10075.
- 687 68. Hetze S, Romer C, Teufelhart C, Meisel A, Engel O. Gait analysis as a method for assessing neurological  
688 outcome in a mouse model of stroke. *J Neurosci Methods.* 2012;206(1):7-14.
- 689 69. Vandeputte C, Taymans JM, Casteels C, Coun F, Ni Y, Van Laere K, et al. Automated quantitative gait  
690 analysis in animal models of movement disorders. *BMC Neurosci.* 2010;11:92.

- 691 70. Otero-Ortega L, Laso-Garcia F, Gomez-de Frutos MD, Rodriguez-Frutos B, Pascual-Guerra J, Fuentes B,  
692 et al. White Matter Repair After Extracellular Vesicles Administration in an Experimental Animal Model of  
693 Subcortical Stroke. *Sci Rep.* 2017;7:44433.
- 694 71. Xin H, Li Y, Cui Y, Yang JJ, Zhang ZG, Chopp M. Systemic administration of exosomes released from  
695 mesenchymal stromal cells promote functional recovery and neurovascular plasticity after stroke in rats. *J Cereb*  
696 *Blood Flow Metab.* 2013;33(11):1711-5.
- 697 72. Zhang Y, Chopp M, Meng Y, Katakowski M, Xin H, Mahmood A, et al. Effect of exosomes derived from  
698 multipotent mesenchymal stromal cells on functional recovery and neurovascular plasticity in rats after  
699 traumatic brain injury. *J Neurosurg.* 2015;122(4):856-67.
- 700 73. Zhang Y, Chopp M, Zhang ZG, Katakowski M, Xin H, Qu C, et al. Systemic administration of cell-free  
701 exosomes generated by human bone marrow derived mesenchymal stem cells cultured under 2D and 3D conditions  
702 improves functional recovery in rats after traumatic brain injury. *Neurochem Int.* 2016.
- 703 74. Schellinger PD, Jansen O, Fiebich JB, Hacke W, Sartor K. A standardized MRI stroke protocol:  
704 comparison with CT in hyperacute intracerebral hemorrhage. *Stroke.* 1999;30(4):765-8.
- 705 75. Jokinen H, Gouw AA, Madureira S, Ylikoski R, van Straaten EC, van der Flier WM, et al. Incident lacunes  
706 influence cognitive decline: the LADIS study. *Neurology.* 2011;76(22):1872-8.
- 707 76. Ahmad AS, Satriotomo I, Fazal J, Nadeau SE, Dore S. Considerations for the Optimization of Induced  
708 White Matter Injury Preclinical Models. *Front Neurol.* 2015;6:172.
- 709 77. Srikanth V, Beare R, Blizzard L, Phan T, Stapleton J, Chen J, et al. Cerebral white matter lesions, gait, and  
710 the risk of incident falls: a prospective population-based study. *Stroke.* 2009;40(1):175-80.
- 711 78. Pikija S, Sztrihá LK, Killer-Oberpfalzer M, Weymayr F, Hecker C, Ramesmayer C, et al. Neutrophil to  
712 lymphocyte ratio predicts intracranial hemorrhage after endovascular thrombectomy in acute ischemic stroke. *J*  
713 *Neuroinflammation.* 2018;15(1):319.
- 714 79. Guo Z, Yu S, Xiao L, Chen X, Ye R, Zheng P, et al. Dynamic change of neutrophil to lymphocyte ratio and  
715 hemorrhagic transformation after thrombolysis in stroke. *J Neuroinflammation.* 2016;13(1):199.
- 716 80. Song Q, Li Y, Wang Y, Wei C, Liu J, Liu M. Increased Neutrophil-to-lymphocyte Ratios are Associated  
717 with Greater Risk of Hemorrhagic Transformation in Patients with Acute Ischemic Stroke. *Curr Neurovasc Res.*  
718 2018;15(4):326-35.

- 719 81. Cappellari M, Moretto G, Bovi P. Day-7 modified Rankin Scale score as the best measure of the  
720 thrombolysis direct effect on stroke? *J Thromb Thrombolysis*. 2013;36(3):314-5.
- 721 82. Clark PC, Dunbar SB, Aycock DM, Courtney E, Wolf SL. Caregiver perspectives of memory and behavior  
722 changes in stroke survivors. *Rehabil Nurs*. 2006;31(1):26-32.
- 723 83. Alexander LD, Black SE, Patterson KK, Gao F, Danells CJ, McIlroy WE. Association between gait  
724 asymmetry and brain lesion location in stroke patients. *Stroke*. 2009;40(2):537-44.
- 725 84. Kumar G, Goyal MK, Sahota PK, Jain R. Penumbra, the basis of neuroimaging in acute stroke treatment:  
726 current evidence. *J Neurol Sci*. 2010;288(1-2):13-24.
- 727 85. Ledezma CJ, Fiebach JB, Wintermark M. Modern imaging of the infarct core and the ischemic penumbra  
728 in acute stroke patients: CT versus MRI. *Expert Rev Cardiovasc Ther*. 2009;7(4):395-403.
- 729 86. Saenger AK, Christenson RH. Stroke biomarkers: progress and challenges for diagnosis, prognosis,  
730 differentiation, and treatment. *Clin Chem*. 2010;56(1):21-33.
- 731 87. Gonzalez RG. Clinical MRI of acute ischemic stroke. *J Magn Reson Imaging*. 2012;36(2):259-71.
- 732 88. Sanak D, Nosal V, Horak D, Bartkova A, Zelenak K, Herzig R, et al. Impact of diffusion-weighted MRI-  
733 measured initial cerebral infarction volume on clinical outcome in acute stroke patients with middle cerebral artery  
734 occlusion treated by thrombolysis. *Neuroradiology*. 2006;48(9):632-9.
- 735 89. Luby M, Bykowski JL, Schellinger PD, Merino JG, Warach S. Intra- and interrater reliability of ischemic  
736 lesion volume measurements on diffusion-weighted, mean transit time and fluid-attenuated inversion recovery MRI.  
737 *Stroke*. 2006;37(12):2951-6.
- 738 90. Lansberg MG, O'Brien MW, Tong DC, Moseley ME, Albers GW. Evolution of cerebral infarct volume  
739 assessed by diffusion-weighted magnetic resonance imaging. *Arch Neurol*. 2001;58(4):613-7.
- 740 91. Huisman TA. Diffusion-weighted imaging: basic concepts and application in cerebral stroke and head  
741 trauma. *Eur Radiol*. 2003;13(10):2283-97.
- 742 92. Huisman TA. Diffusion-weighted and diffusion tensor imaging of the brain, made easy. *Cancer Imaging*.  
743 2010;10 Spec no A:S163-71.
- 744 93. Payabvash S, Taleb S, Benson JC, Rykken JB, Oswood MC, McKinney AM, et al. The Effects of DWI-  
745 Infarct Lesion Volume on DWI-FLAIR Mismatch: Is There a Need for Size Stratification? *J Neuroimaging*.  
746 2017;27(4):392-6.

- 747 94. Merino JG, Warach S. Imaging of acute stroke. *Nat Rev Neurol*. 2010;6(10):560-71.
- 748 95. Yoo AJ, Pulli B, Gonzalez RG. Imaging-based treatment selection for intravenous and intra-arterial stroke  
749 therapies: a comprehensive review. *Expert Rev Cardiovasc Ther*. 2011;9(7):857-76.
- 750 96. Assemlal HE, Tschumperle D, Brun L, Siddiqi K. Recent advances in diffusion MRI modeling: Angular  
751 and radial reconstruction. *Med Image Anal*. 2011;15(4):369-96.
- 752 97. Carmichael ST. Rodent models of focal stroke: size, mechanism, and purpose. *NeuroRx*. 2005;2(3):396-  
753 409.
- 754 98. Macrae IM. Preclinical stroke research--advantages and disadvantages of the most common rodent models  
755 of focal ischaemia. *Br J Pharmacol*. 2011;164(4):1062-78.
- 756 99. Stankowski JN, Gupta R. Therapeutic targets for neuroprotection in acute ischemic stroke: lost in  
757 translation? *Antioxid Redox Signal*. 2011;14(10):1841-51.
- 758 100. Jaffer H, Morris VB, Stewart D, Labhassetwar V. Advances in stroke therapy. *Drug Deliv Transl Res*.  
759 2011;1(6):409-19.
- 760 101. Selim M, Fink JN, Kumar S, Caplan LR, Horkan C, Chen Y, et al. Predictors of hemorrhagic  
761 transformation after intravenous recombinant tissue plasminogen activator: prognostic value of the initial apparent  
762 diffusion coefficient and diffusion-weighted lesion volume. *Stroke*. 2002;33(8):2047-52.
- 763 102. Berrouschot J, Sterker M, Bettin S, Koster J, Schneider D. Mortality of space-occupying ('malignant')  
764 middle cerebral artery infarction under conservative intensive care. *Intensive Care Med*. 1998;24(6):620-3.
- 765 103. Hacke W, Schwab S, Horn M, Spranger M, De Georgia M, von Kummer R. 'Malignant' middle cerebral  
766 artery territory infarction: clinical course and prognostic signs. *Arch Neurol*. 1996;53(4):309-15.
- 767 104. Thrift AG, Dewey HM, Macdonell RA, McNeil JJ, Donnan GA. Stroke incidence on the east coast of  
768 Australia: the North East Melbourne Stroke Incidence Study (NEMESIS). *Stroke*. 2000;31(9):2087-92.
- 769 105. Arnaout OM, Aoun SG, Batjer HH, Bendok BR. Decompressive hemicraniectomy after malignant middle  
770 cerebral artery infarction: rationale and controversies. *Neurosurg Focus*. 2011;30(6):E18.
- 771 106. Vahedi K, Hofmeijer J, Juettler E, Vicaut E, George B, Algra A, et al. Early decompressive surgery in  
772 malignant infarction of the middle cerebral artery: a pooled analysis of three randomised controlled trials. *Lancet*  
773 *Neurol*. 2007;6(3):215-22.



- 774 107. Wang DZ, Nair DS, Talkad AV. Acute Decompressive Hemicraniectomy to Control High Intracranial  
775 Pressure in Patients with Malignant MCA Ischemic Strokes. *Curr Treat Options Cardiovasc Med.* 2011;13(3):225-  
776 32.
- 777 108. O'Collins VE, Macleod MR, Donnan GA, Horky LL, van der Worp BH, Howells DW. 1,026 experimental  
778 treatments in acute stroke. *Ann Neurol.* 2006;59(3):467-77.
- 779 109. Kotwica Z, Hardemark HG, Persson L. Intracranial pressure changes following middle cerebral artery  
780 occlusion in rats. *Res Exp Med (Berl).* 1991;191(2):99-104.
- 781 110. DeVries AC, Nelson RJ, Traystman RJ, Hurn PD. Cognitive and behavioral assessment in experimental  
782 stroke research: will it prove useful? *Neurosci Biobehav Rev.* 2001;25(4):325-42.
- 783 111. Schirmacher R, Dea M, Heiss WD, Kostikov A, Funck T, Quessy S, et al. Which Aspects of Stroke Do  
784 Animal Models Capture? A Multitracer Micro-PET Study of Focal Ischemia with Endothelin-1. *Cerebrovasc Dis.*  
785 2016;41(3-4):139-47.
- 786 112. Hughes PM, Anthony DC, Ruddin M, Botham MS, Rankine EL, Sablone M, et al. Focal lesions in the rat  
787 central nervous system induced by endothelin-1. *J Neuropathol Exp Neurol.* 2003;62(12):1276-86.
- 788 113. Fuxe K, Bjelke B, Andbjør B, Grahn H, Rimondini R, Agnati LF. Endothelin-1 induced lesions of the  
789 frontoparietal cortex of the rat. A possible model of focal cortical ischemia. *Neuroreport.* 1997;8(11):2623-9.
- 790 114. Fluri F, Schuhmann MK, Kleinschnitz C. Animal models of ischemic stroke and their application in  
791 clinical research. *Drug Des Devel Ther.* 2015;9:3445-54.
- 792 115. Wells AJ, Vink R, Helps SC, Knox SJ, Blumbergs PC, Turner RJ. Elevated Intracranial Pressure and  
793 Cerebral Edema following Permanent MCA Occlusion in an Ovine Model. *PLoS One.* 2015;10(6):e0130512.
- 794 116. Ropper AH. Lateral displacement of the brain and level of consciousness in patients with an acute  
795 hemispherical mass. *N Engl J Med.* 1986;314(15):953-8.
- 796 117. Treadwell SD, Thanvi B. Malignant middle cerebral artery (MCA) infarction: pathophysiology, diagnosis  
797 and management. *Postgrad Med J.* 2010;86(1014):235-42.
- 798 118. Walberer M, Blaes F, Stolz E, Müller C, Schoenburg M, Tschernatsch M, et al. Midline-shift corresponds  
799 to the amount of brain edema early after hemispheric stroke--an MRI study in rats. *J Neurosurg Anesthesiol.*  
800 2007;19(2):105-10.

- 801 119. Alharbi BM, Tso MK, Macdonald RL. Animal models of spontaneous intracerebral hemorrhage. *Neurol*  
802 *Res.* 2016;38(5):448-55.
- 803 120. Jaillard A, Cornu C, Durieux A, Moulin T, Boutitie F, Lees KR, et al. Hemorrhagic transformation in acute  
804 ischemic stroke. The MAST-E study. MAST-E Group. *Stroke.* 1999;30(7):1326-32.
- 805 121. Bang OY, Saver JL, Kim SJ, Kim GM, Chung CS, Ovbiagele B, et al. Collateral flow averts hemorrhagic  
806 transformation after endovascular therapy for acute ischemic stroke. *Stroke.* 2011;42(8):2235-9.
- 807 122. D'Amelio M, Terruso V, Famoso G, Di Benedetto N, Realmuto S, Valentino F, et al. Early and late  
808 mortality of spontaneous hemorrhagic transformation of ischemic stroke. *J Stroke Cerebrovasc Dis.* 2014;23(4):649-  
809 54.
- 810 123. Fiorelli M, Bastianello S, von Kummer R, del Zoppo GJ, Larrue V, Lesaffre E, et al. Hemorrhagic  
811 transformation within 36 hours of a cerebral infarct: relationships with early clinical deterioration and 3-month  
812 outcome in the European Cooperative Acute Stroke Study I (ECASS I) cohort. *Stroke.* 1999;30(11):2280-4.
- 813 124. Caceres JA, Goldstein JN. Intracranial hemorrhage. *Emerg Med Clin North Am.* 2012;30(3):771-94.
- 814 125. Sahni R, Weinberger J. Management of intracerebral hemorrhage. *Vasc Health Risk Manag.*  
815 2007;3(5):701-9.
- 816 126. Castro P, Azevedo E, Serrador J, Rocha I, Sorond F. Hemorrhagic transformation and cerebral edema in  
817 acute ischemic stroke: Link to cerebral autoregulation. *J Neurol Sci.* 2017;372:256-61.
- 818 127. Zhang J, Yang Y, Sun H, Xing Y. Hemorrhagic transformation after cerebral infarction: current concepts  
819 and challenges. *Ann Transl Med.* 2014;2(8):81.
- 820 128. Kanazawa M, Takahashi T, Nishizawa M, Shimohata T. Therapeutic Strategies to Attenuate Hemorrhagic  
821 Transformation After Tissue Plasminogen Activator Treatment for Acute Ischemic Stroke. *J Atheroscler Thromb.*  
822 2017;24(3):240-53.
- 823 129. Yaghi S, Willey JZ, Cucchiara B, Goldstein JN, Gonzales NR, Khatri P, et al. Treatment and Outcome of  
824 Hemorrhagic Transformation After Intravenous Alteplase in Acute Ischemic Stroke: A Scientific Statement for  
825 Healthcare Professionals From the American Heart Association/American Stroke Association. *Stroke.*  
826 2017;48(12):e343-e61.
- 827 130. Biesbroek JM, Weaver NA, Biessels GJ. Lesion location and cognitive impact of cerebral small vessel  
828 disease. *Clin Sci (Lond).* 2017;131(8):715-28.

- 829 131. Lee KB, Kim JS, Hong BY, Sul B, Song S, Sung WJ, et al. Brain lesions affecting gait recovery in stroke  
830 patients. *Brain Behav.* 2017;7(11):e00868.
- 831 132. Corriveau H, Hebert R, Raiche M, Prince F. Evaluation of postural stability in the elderly with stroke. *Arch*  
832 *Phys Med Rehabil.* 2004;85(7):1095-101.
- 833 133. Roth EJ, Merbitz C, Mroczek K, Dugan SA, Suh WW. Hemiplegic gait. Relationships between walking  
834 speed and other temporal parameters. *Am J Phys Med Rehabil.* 1997;76(2):128-33.
- 835 134. Dickstein R, Shefi S, Marcovitz E, Villa Y. Anticipatory postural adjustment in selected trunk muscles in  
836 post stroke hemiparetic patients. *Arch Phys Med Rehabil.* 2004;85(2):261-7.
- 837 135. Titianova EB, Tarkka IM. Asymmetry in walking performance and postural sway in patients with chronic  
838 unilateral cerebral infarction. *J Rehabil Res Dev.* 1995;32(3):236-44.
- 839 136. Hidler JM, Carroll M, Federovich EH. Strength and coordination in the paretic leg of individuals following  
840 acute stroke. *IEEE Trans Neural Syst Rehabil Eng.* 2007;15(4):526-34.
- 841 137. Duberstein KJ, Platt SR, Holmes SP, Dove CR, Howerth EW, Kent M, et al. Gait analysis in a pre- and  
842 post-ischemic stroke biomedical pig model. *Physiol Behav.* 2014;125:8-16.
- 843 138. Chamorro A, Hallenbeck J. The harms and benefits of inflammatory and immune responses in vascular  
844 disease. *Stroke.* 2006;37(2):291-3.
- 845 139. Kleinig TJ, Vink R. Suppression of inflammation in ischemic and hemorrhagic stroke: therapeutic options.  
846 *Curr Opin Neurol.* 2009;22(3):294-301.
- 847 140. Haeusler KG, Schmidt WU, Fohring F, Meisel C, Helms T, Jungehulsing GJ, et al. Cellular  
848 immunodepression preceding infectious complications after acute ischemic stroke in humans. *Cerebrovasc Dis.*  
849 2008;25(1-2):50-8.
- 850 141. Vogelgesang A, Grunwald U, Langner S, Jack R, Broker BM, Kessler C, et al. Analysis of lymphocyte  
851 subsets in patients with stroke and their influence on infection after stroke. *Stroke; a journal of cerebral circulation.*  
852 2008;39(1):237-41.
- 853 142. Schwartz M, Moalem G. Beneficial immune activity after CNS injury: prospects for vaccination. *J*  
854 *Neuroimmunol.* 2001;113(2):185-92.
- 855 143. Kim JY, Kawabori M, Yenari MA. Innate inflammatory responses in stroke: mechanisms and potential  
856 therapeutic targets. *Curr Med Chem.* 2014;21(18):2076-97.

- 857 144. Kim J, Song TJ, Park JH, Lee HS, Nam CM, Nam HS, et al. Different prognostic value of white blood cell  
858 subtypes in patients with acute cerebral infarction. *Atherosclerosis*. 2012;222(2):464-7.
- 859 145. Xue J, Huang W, Chen X, Li Q, Cai Z, Yu T, et al. Neutrophil-to-Lymphocyte Ratio Is a Prognostic  
860 Marker in Acute Ischemic Stroke. *Journal of stroke and cerebrovascular diseases : the official journal of National*  
861 *Stroke Association*. 2017;26(3):650-7.
- 862 146. Zhang J, Ren Q, Song Y, He M, Zeng Y, Liu Z, et al. Prognostic role of neutrophil-lymphocyte ratio in  
863 patients with acute ischemic stroke. *Medicine (Baltimore)*. 2017;96(45):e8624.
- 864 147. Suh B, Shin DW, Kwon HM, Yun JM, Yang HK, Ahn E, et al. Elevated neutrophil to lymphocyte ratio and  
865 ischemic stroke risk in generally healthy adults. *PLoS One*. 2017;12(8):e0183706.
- 866 148. Lattanzi S, Cagnetti C, Provinciali L, Silvestrini M. Neutrophil-to-lymphocyte ratio and neurological  
867 deterioration following acute cerebral hemorrhage. *Oncotarget*. 2017;8(34):57489-94.
- 868 149. Balkaya M, Krober JM, Rex A, Endres M. Assessing post-stroke behavior in mouse models of focal  
869 ischemia. *J Cereb Blood Flow Metab*. 2013;33(3):330-8.
- 870 150. Crawley JN. Exploratory behavior models of anxiety in mice. *Neuroscience and biobehavioral reviews*.  
871 1985;9(1):37-44.
- 872 151. Belzung C, Griebel G. Measuring normal and pathological anxiety-like behaviour in mice: a review.  
873 *Behavioural brain research*. 2001;125(1-2):141-9.
- 874 152. Studnitz M, Jensen MB, Pedersen LJJ Aabs. Why do pigs root and in what will they root?: A review on the  
875 exploratory behaviour of pigs in relation to environmental enrichment. *Applied Animal Behaviour Science*.  
876 2007;107(3-4):183-97.
- 877 153. Chemerinski E, Robinson RG. The neuropsychiatry of stroke. *Psychosomatics*. 2000;41(1):5-14.
- 878 154. van Almenkerk S, Depla MF, Smalbrugge M, Eefsting JA, Hertogh CM. Institutionalized stroke patients:  
879 status of functioning of an under researched population. *J Am Med Dir Assoc*. 2012;13(7):634-9.
- 880 155. Association AP. Diagnostic and statistical manual of mental disorders (DSM-5®): American Psychiatric  
881 Pub; 2013.
- 882 156. Andersen G, Vestergaard K, Ingemann-Nielsen M, Lauritzen L. Risk factors for post-stroke depression.  
883 *Acta Psychiatr Scand*. 1995;92(3):193-8.
- 884

# (A) Post-stroke DWI

# (B) Post-stroke ADC

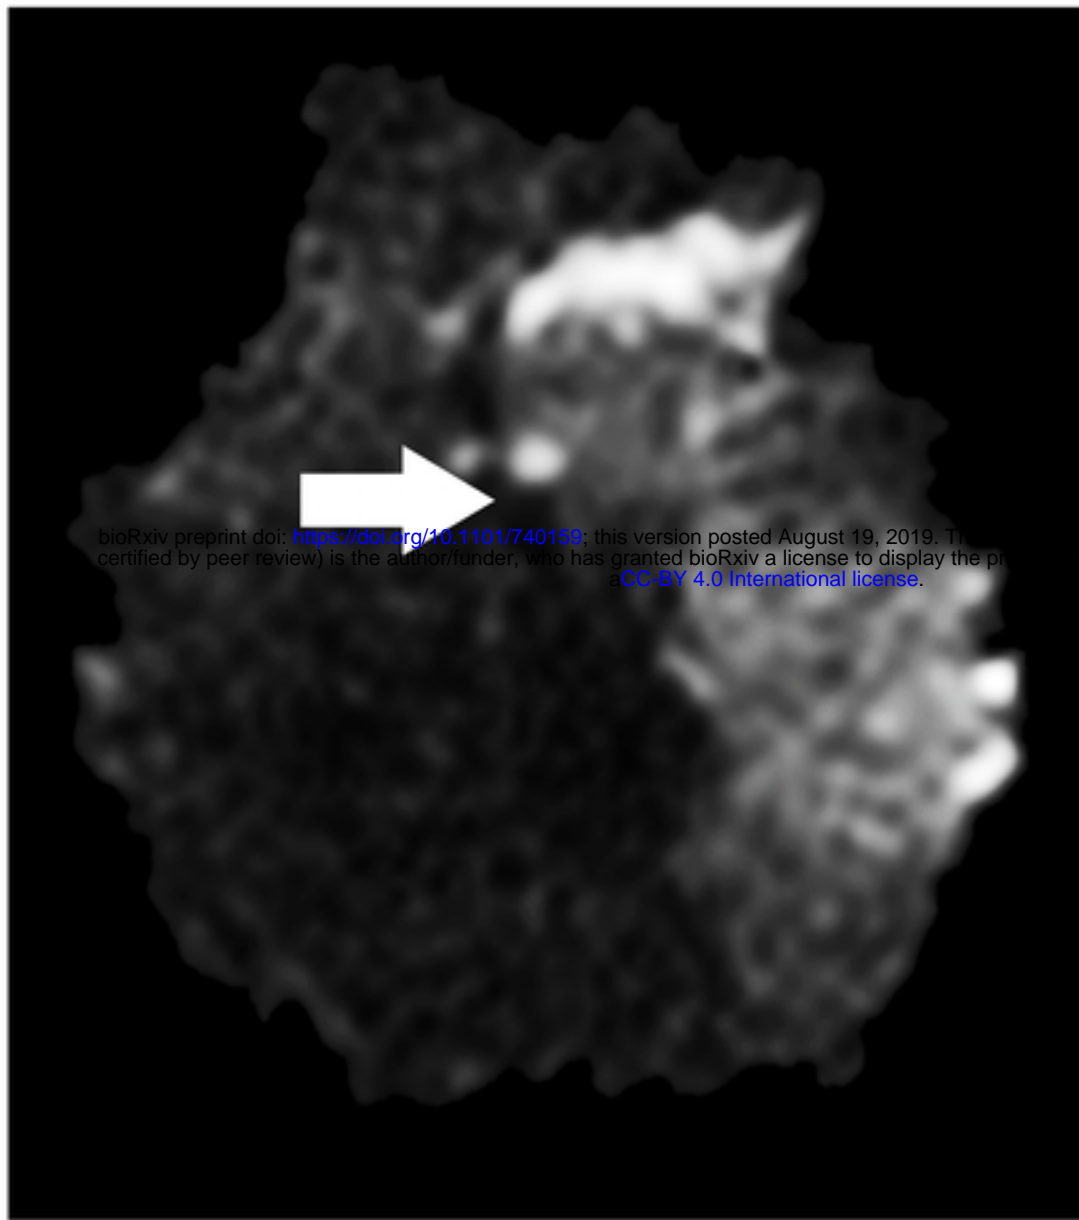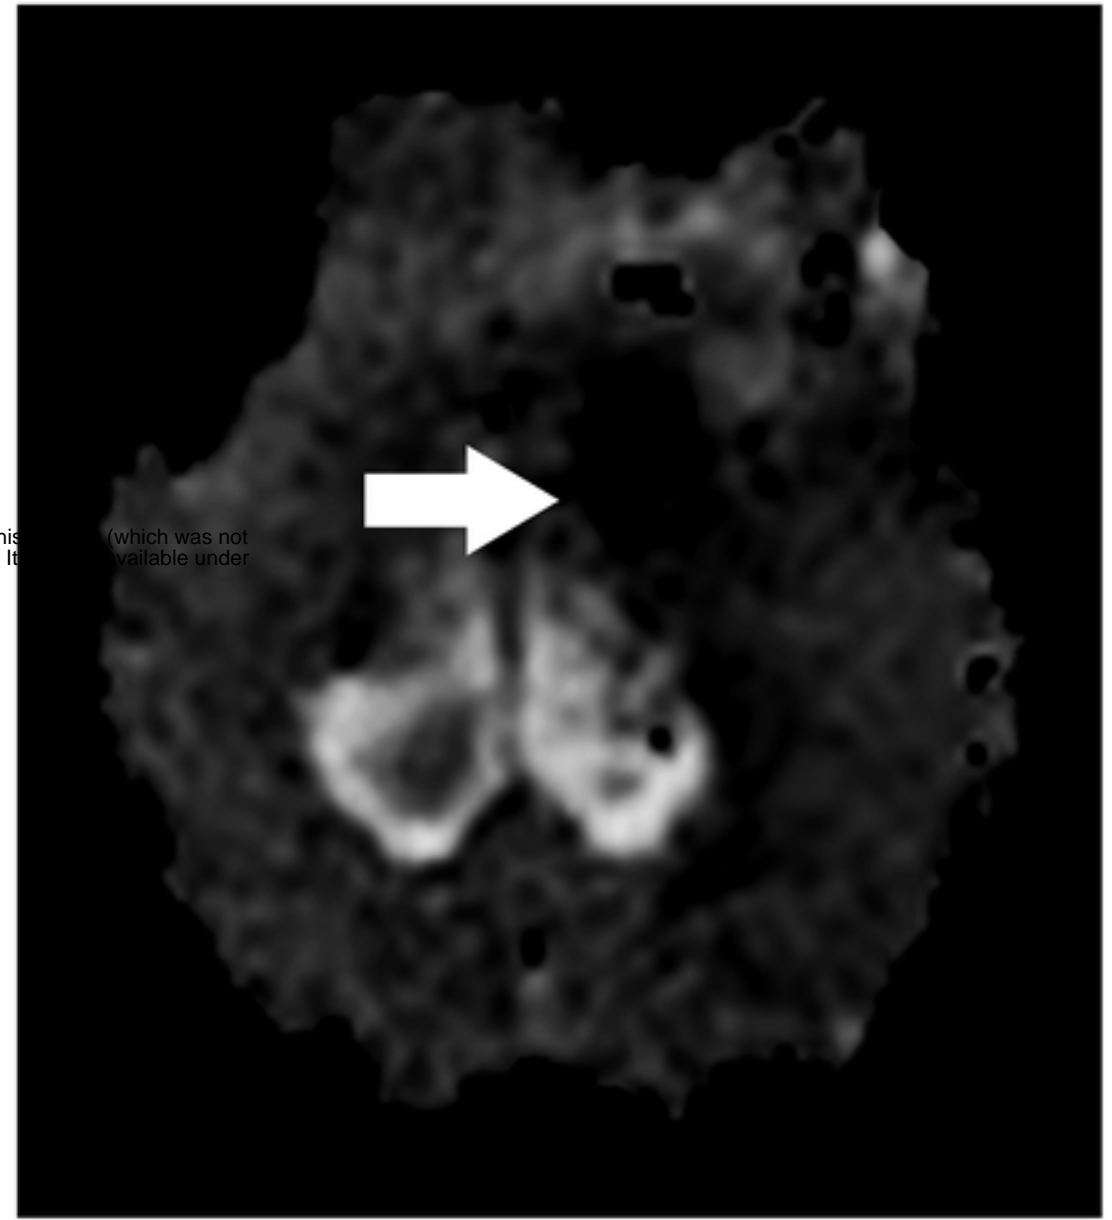

# (C)

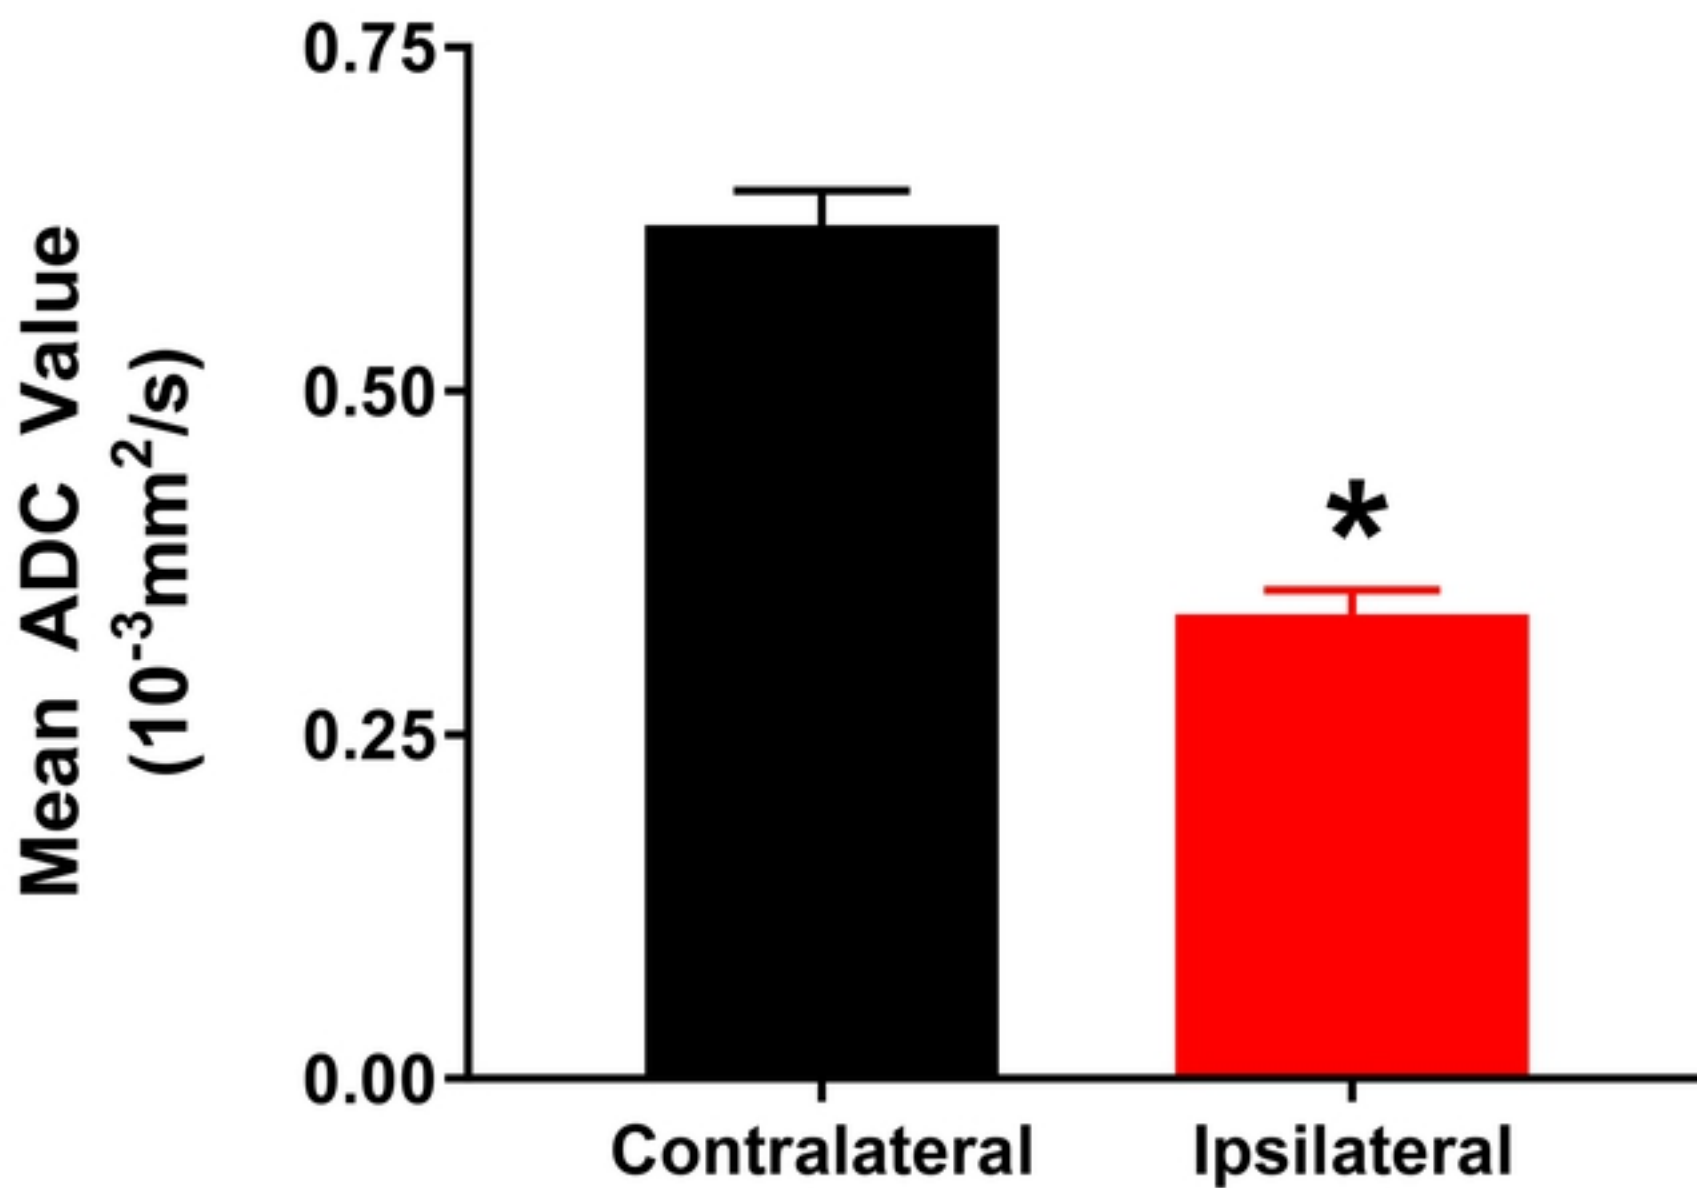

Figure 1

**(A) Pre-stroke T2W**

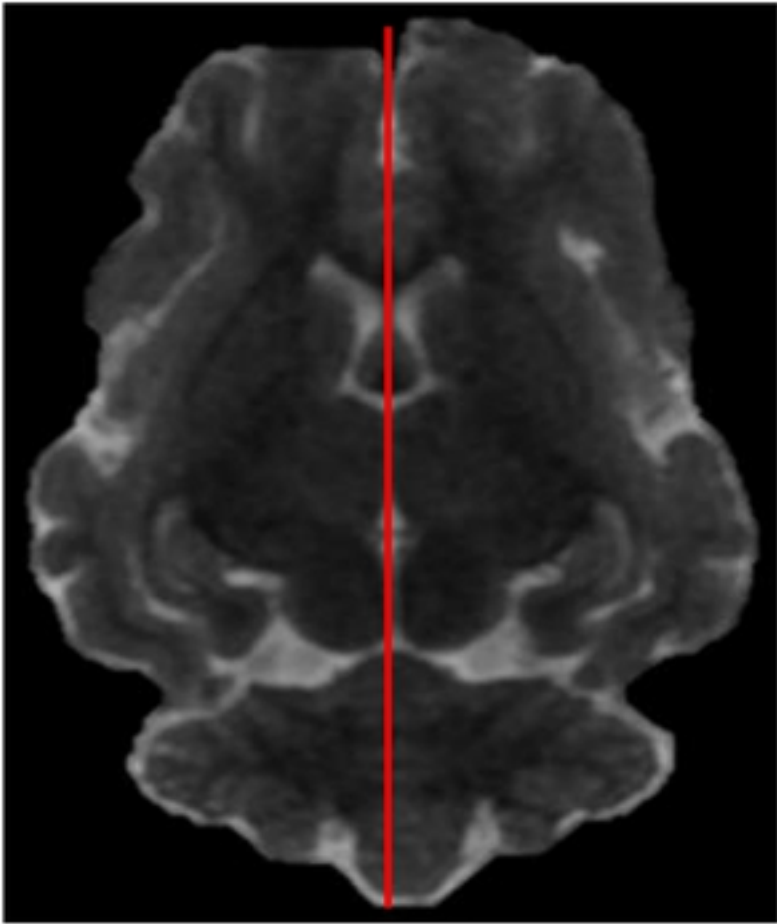

**(B) Post-stroke T2W**

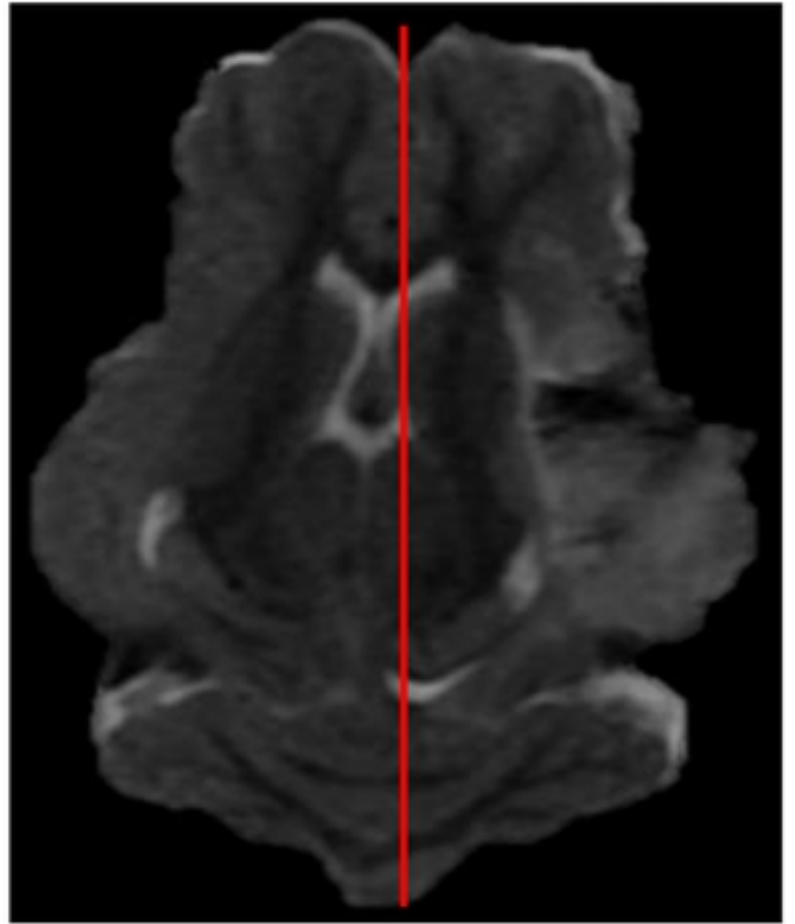

**(C)**

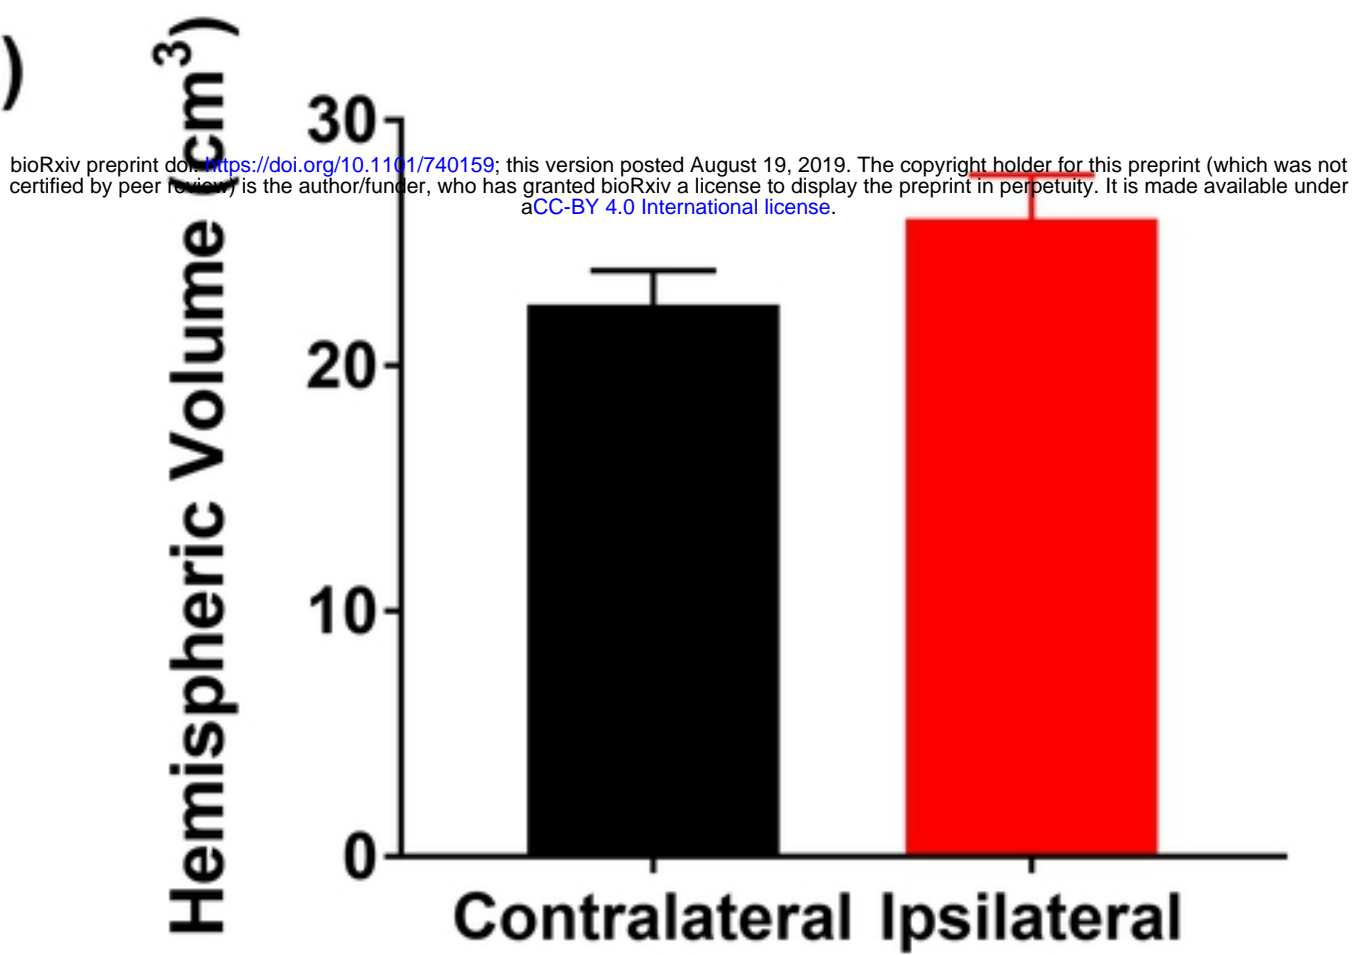

**(D) Pre-stroke T2\***

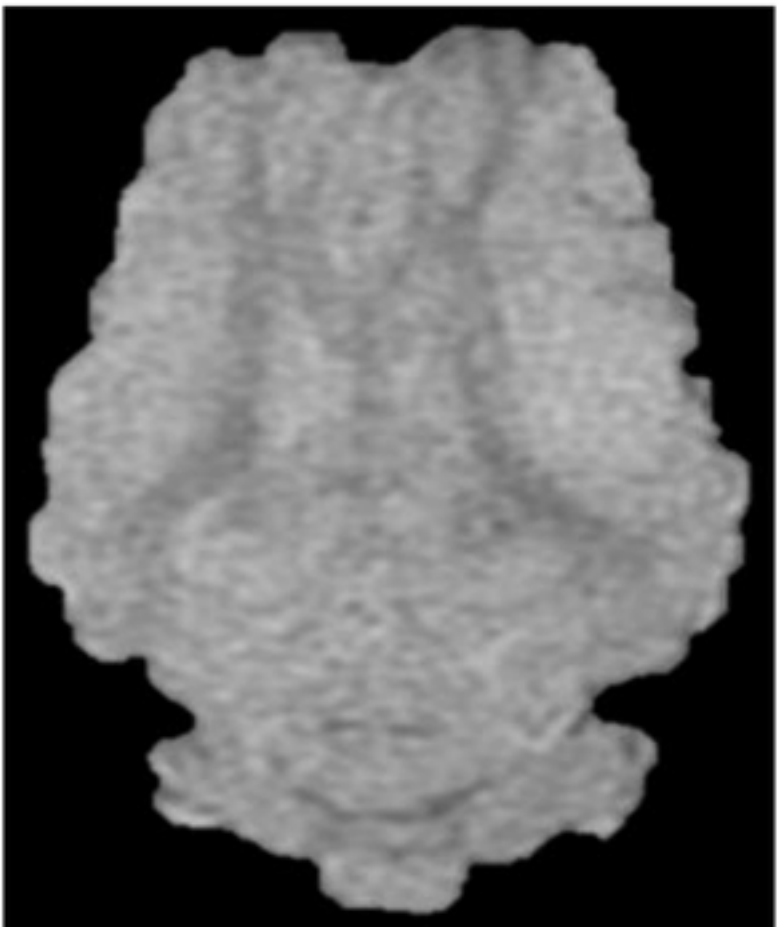

**(E) Post-stroke T2\***

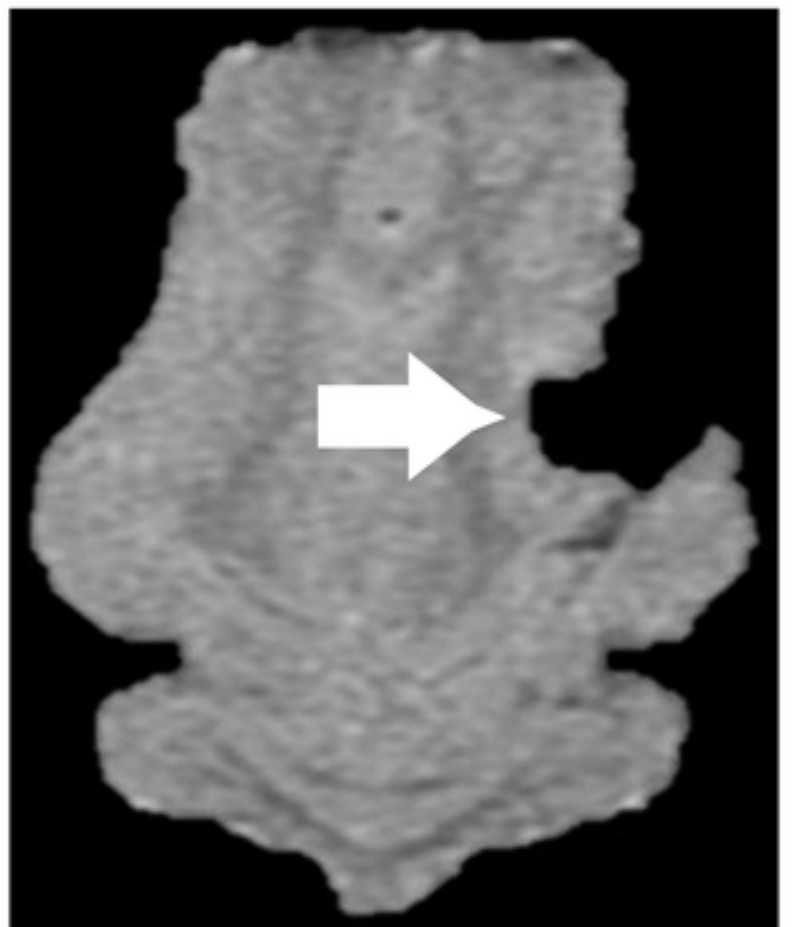

Figure 2

# (A) Pre-stroke FA

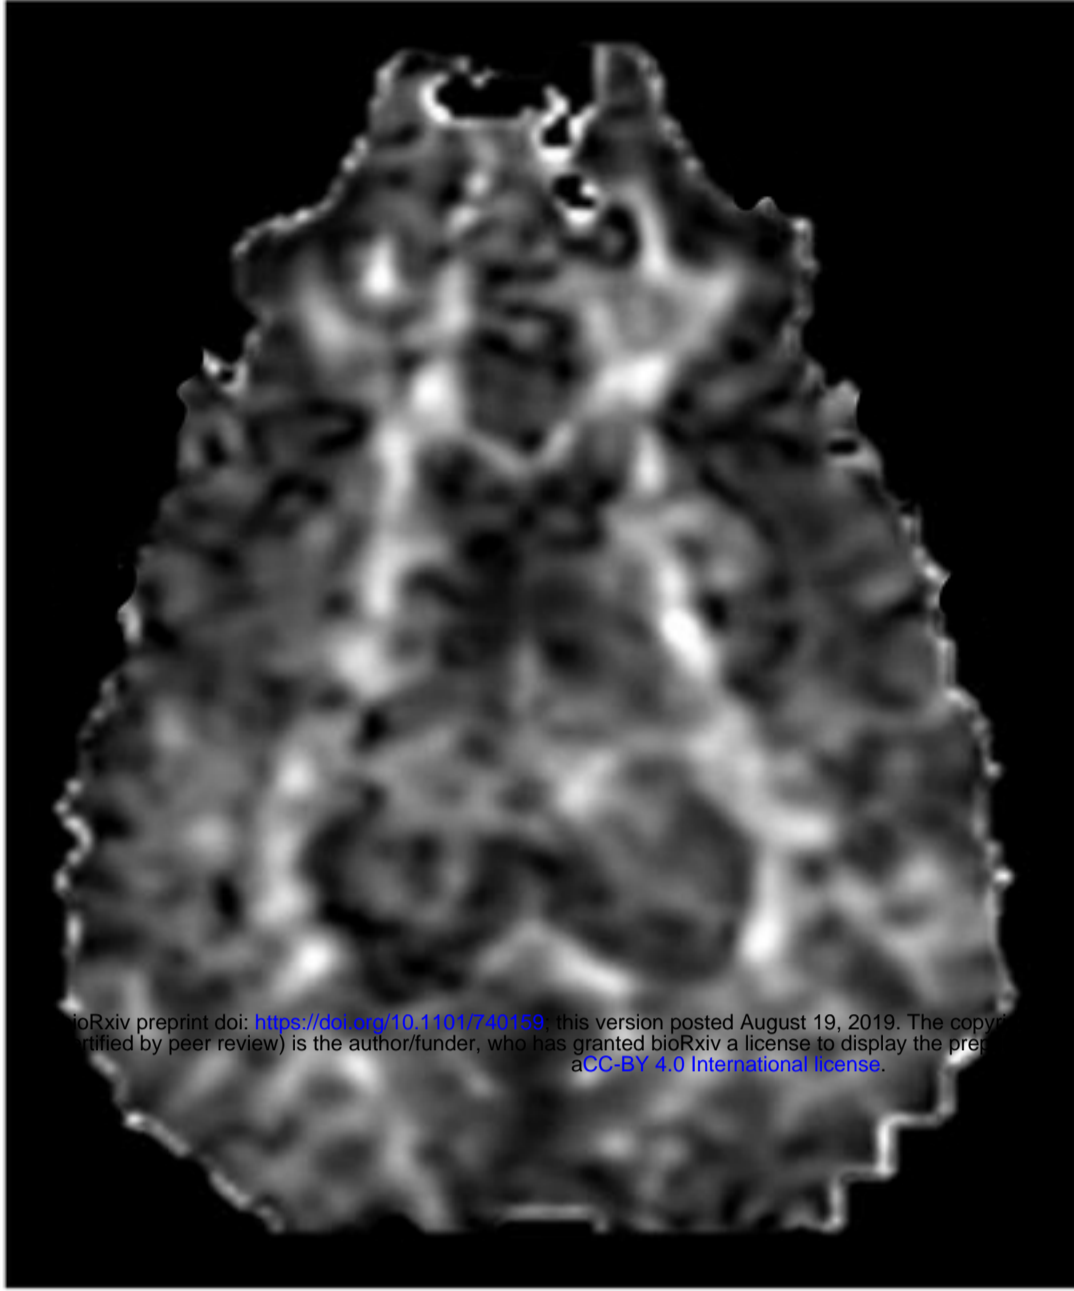

# (B) Post-stroke FA

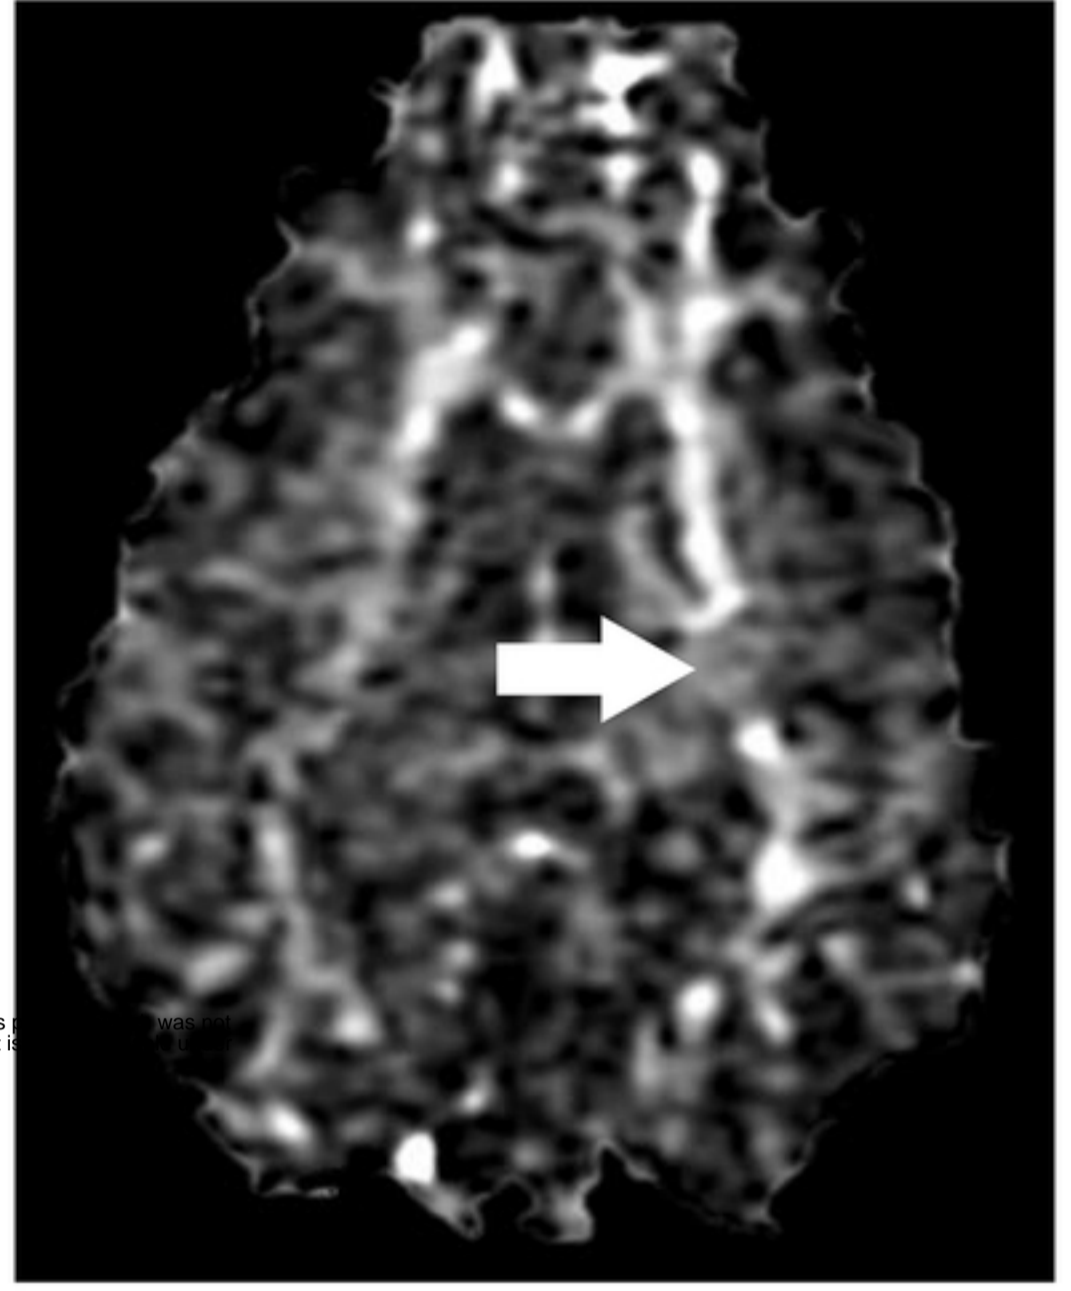

# (C)

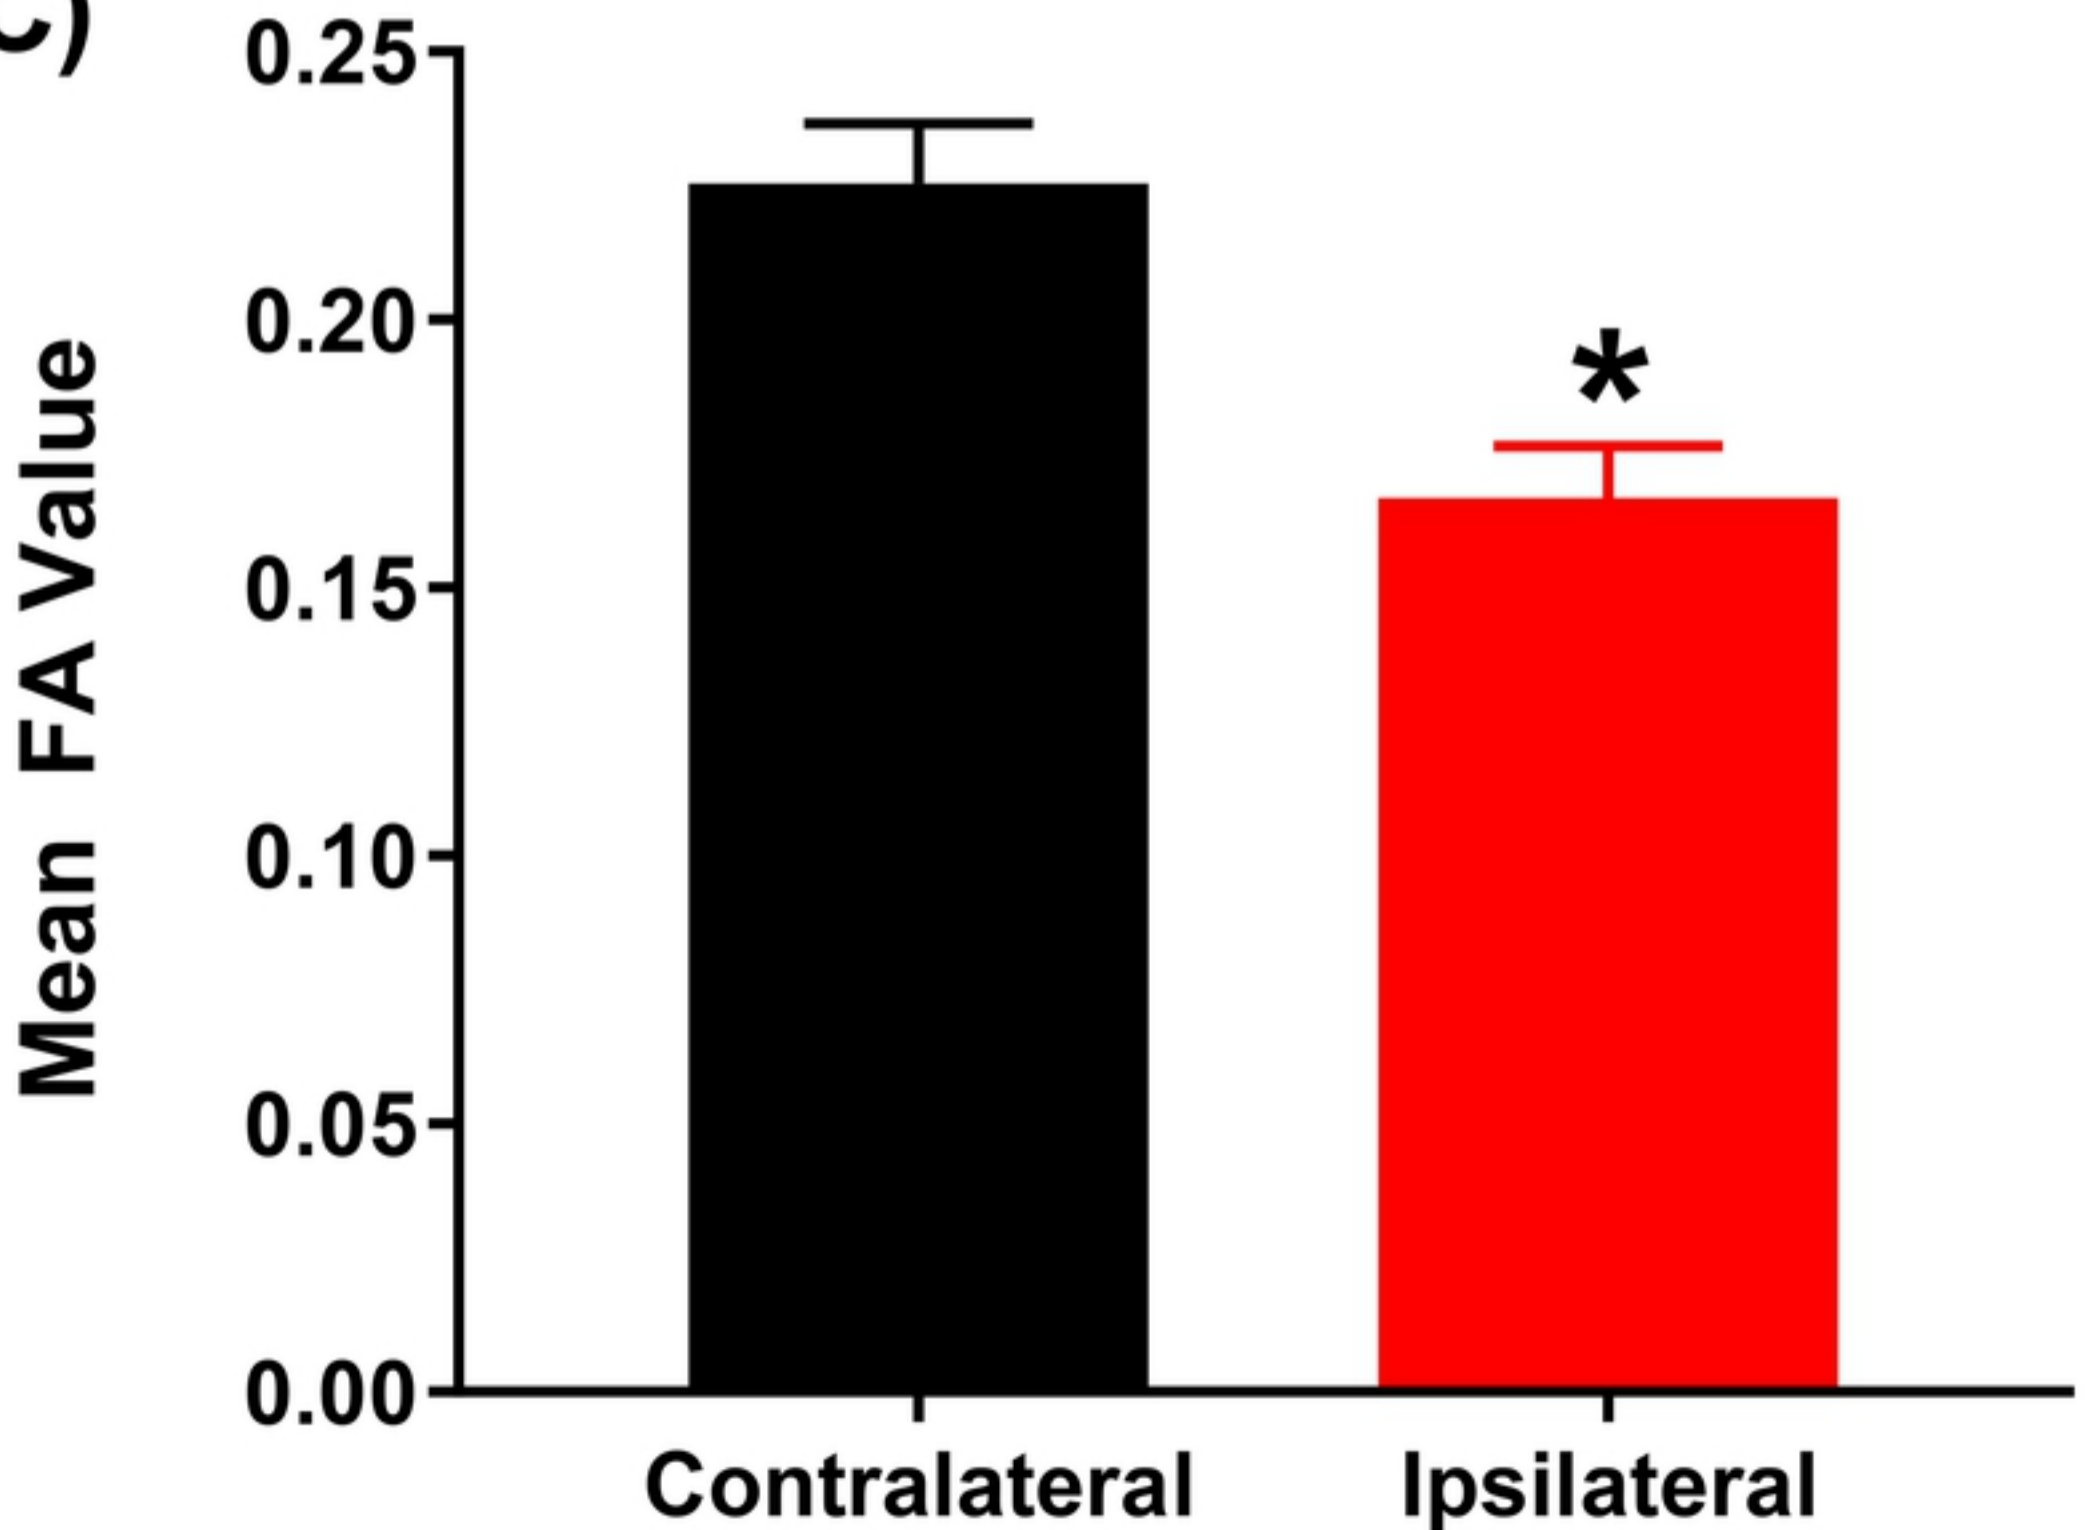

Figure 3

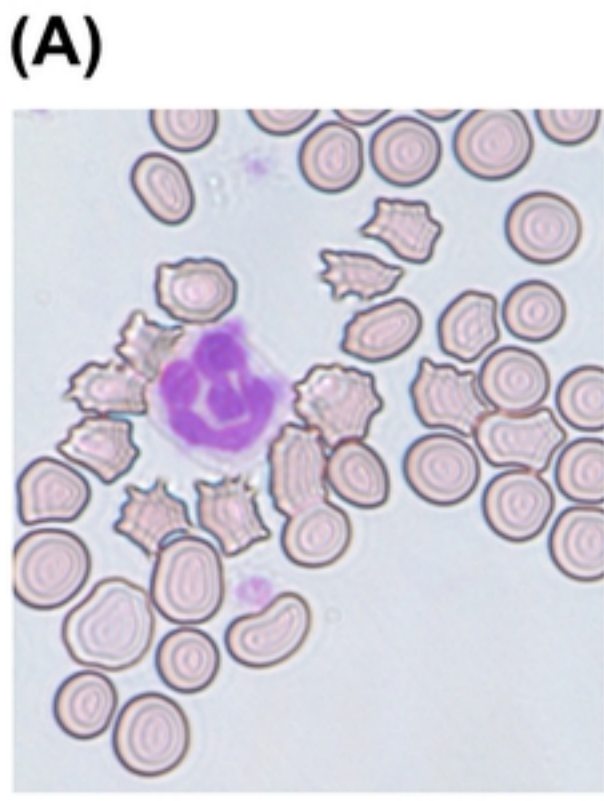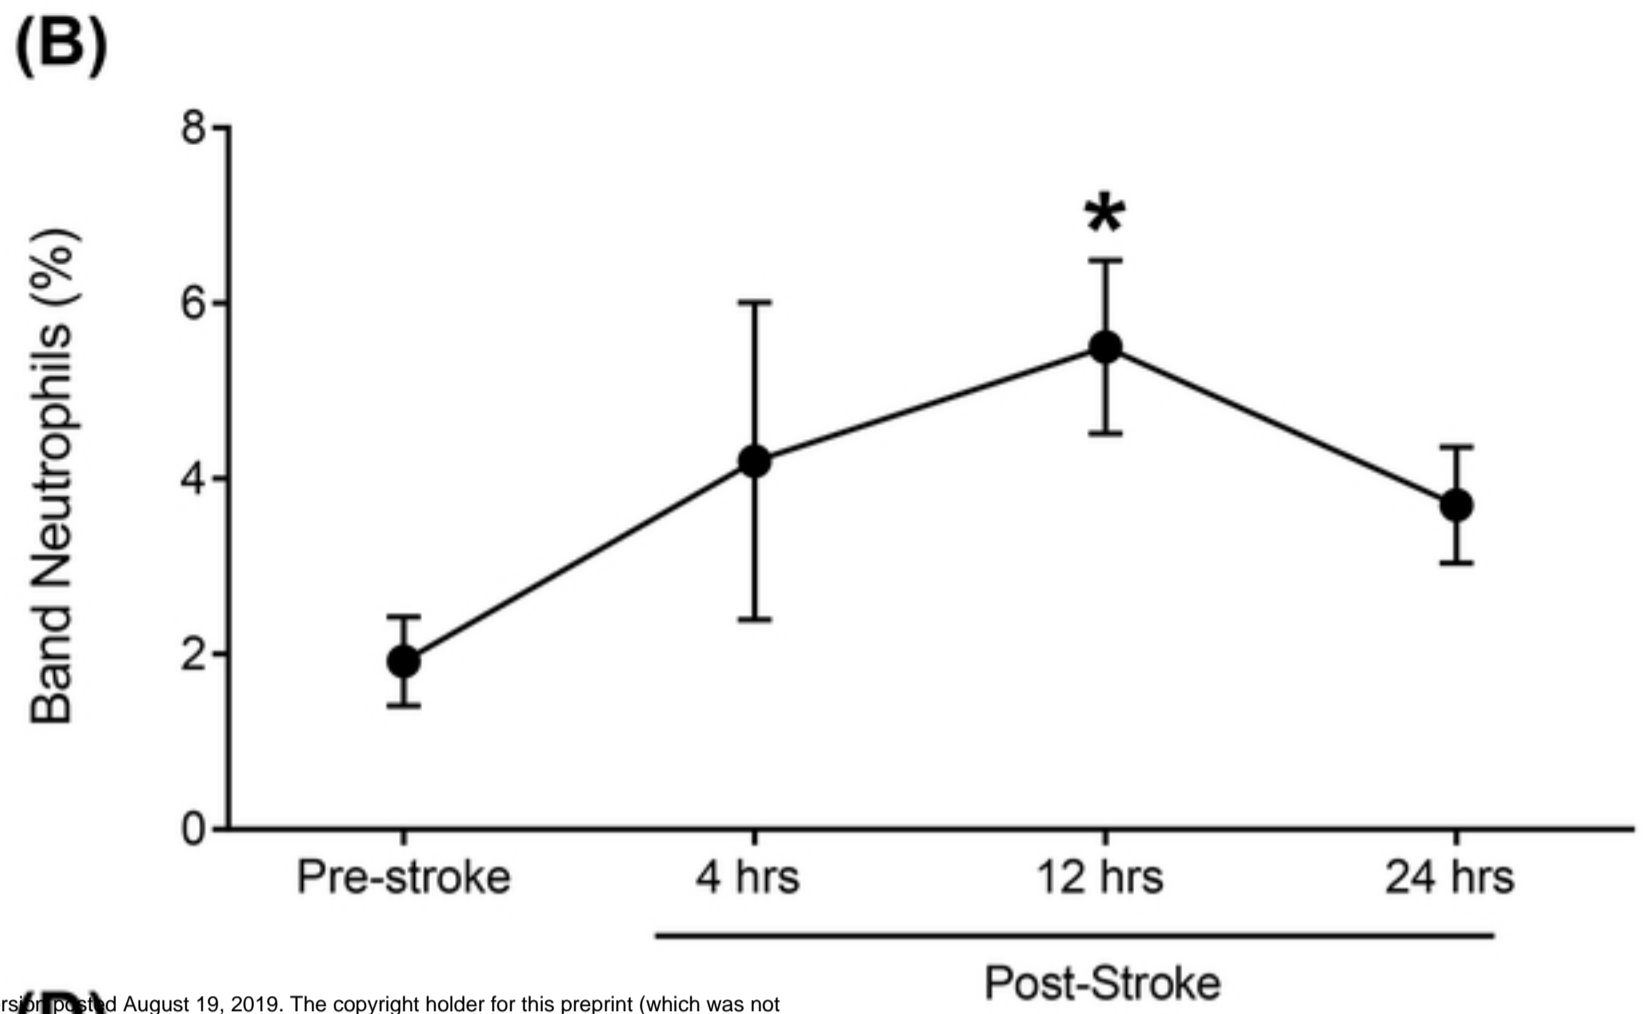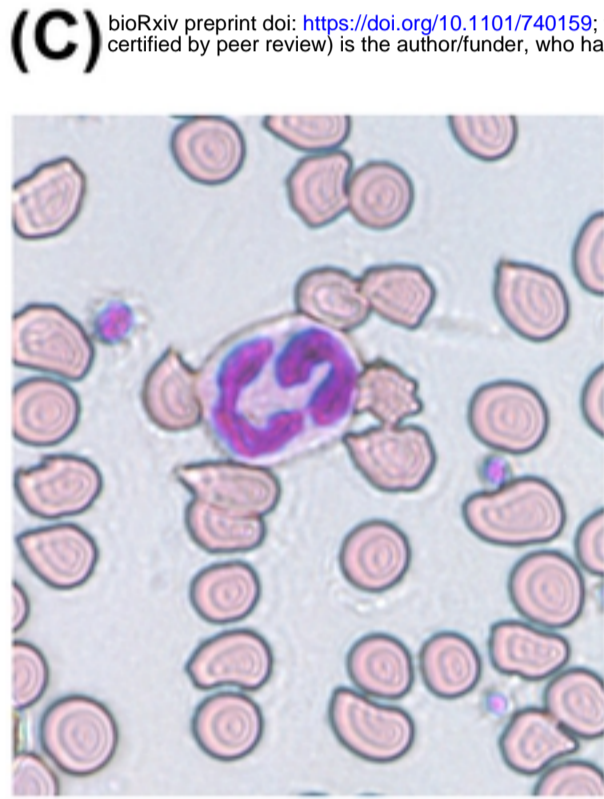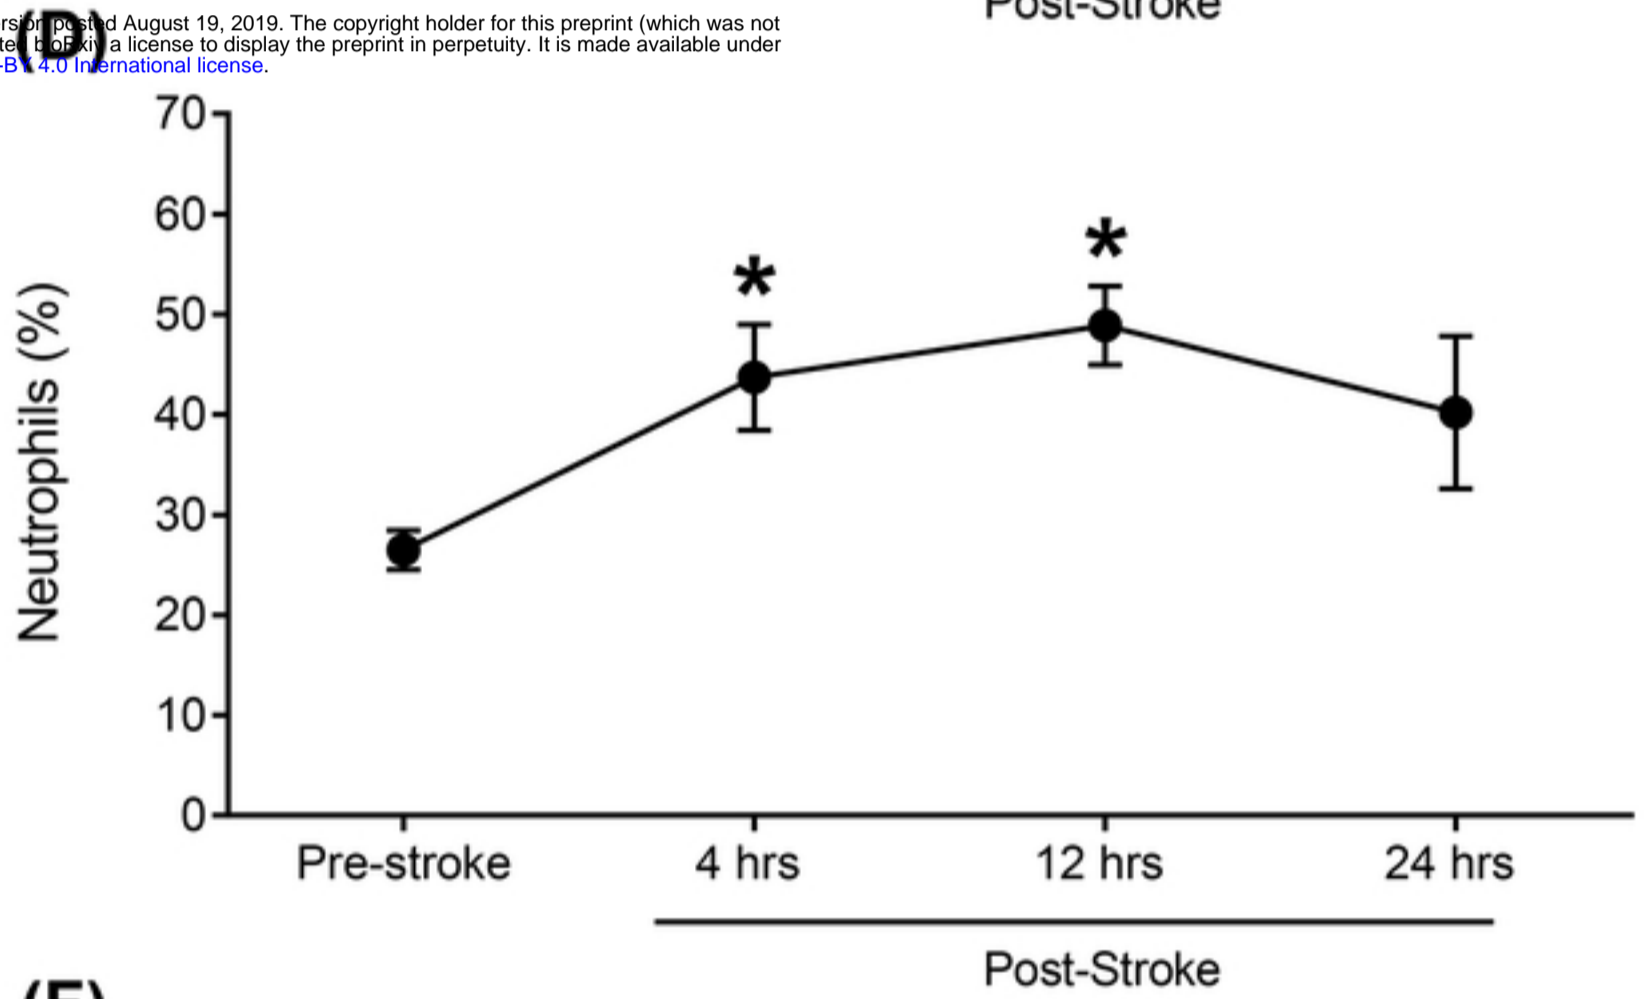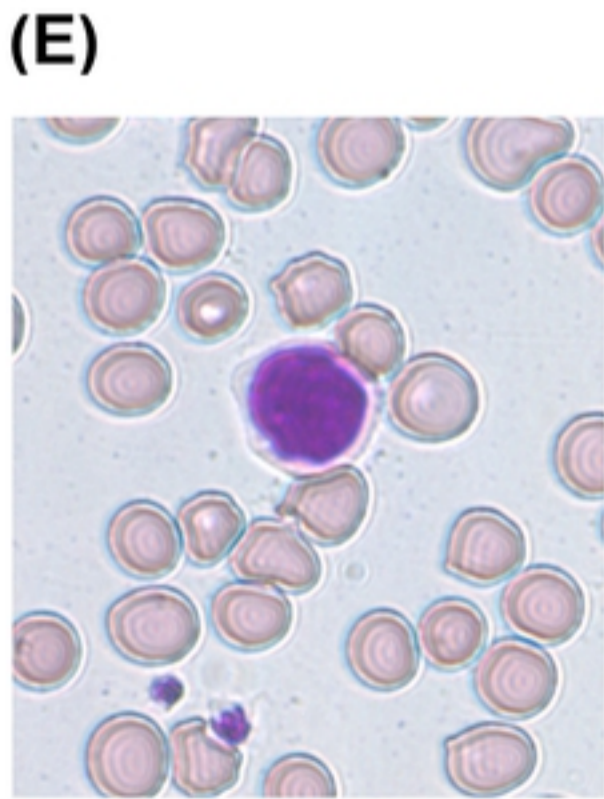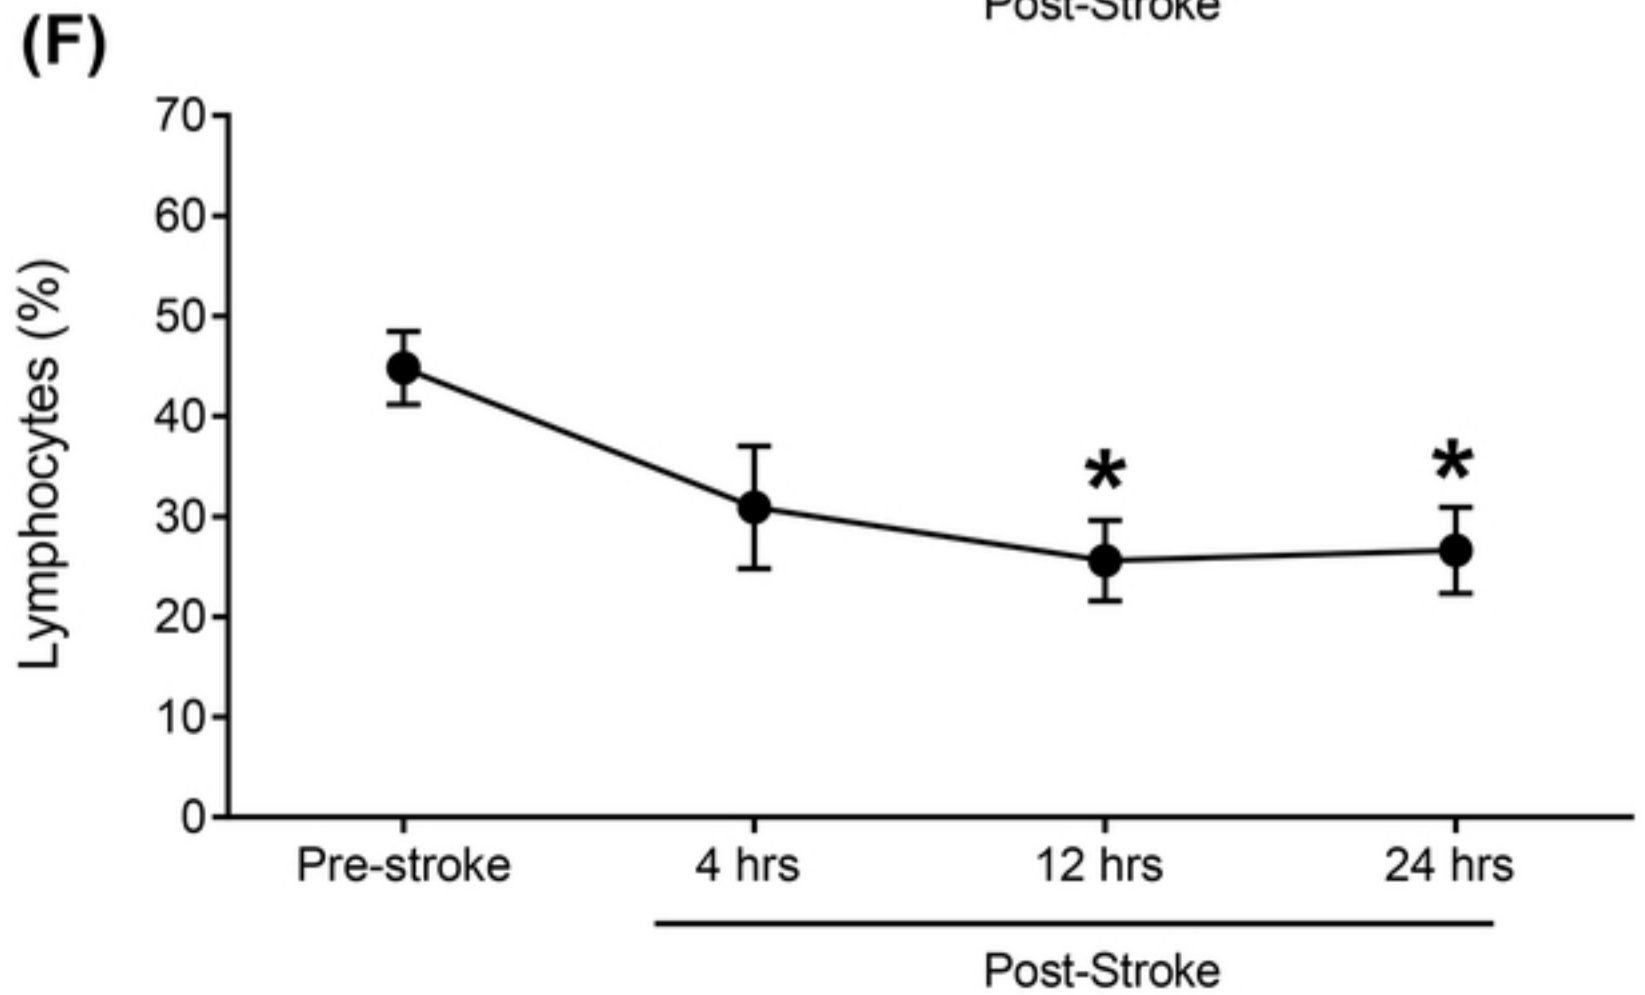

Figure 4



# (A) Pre-stroke Perimeter Sniffing (B) Post-stroke Perimeter Sniffing

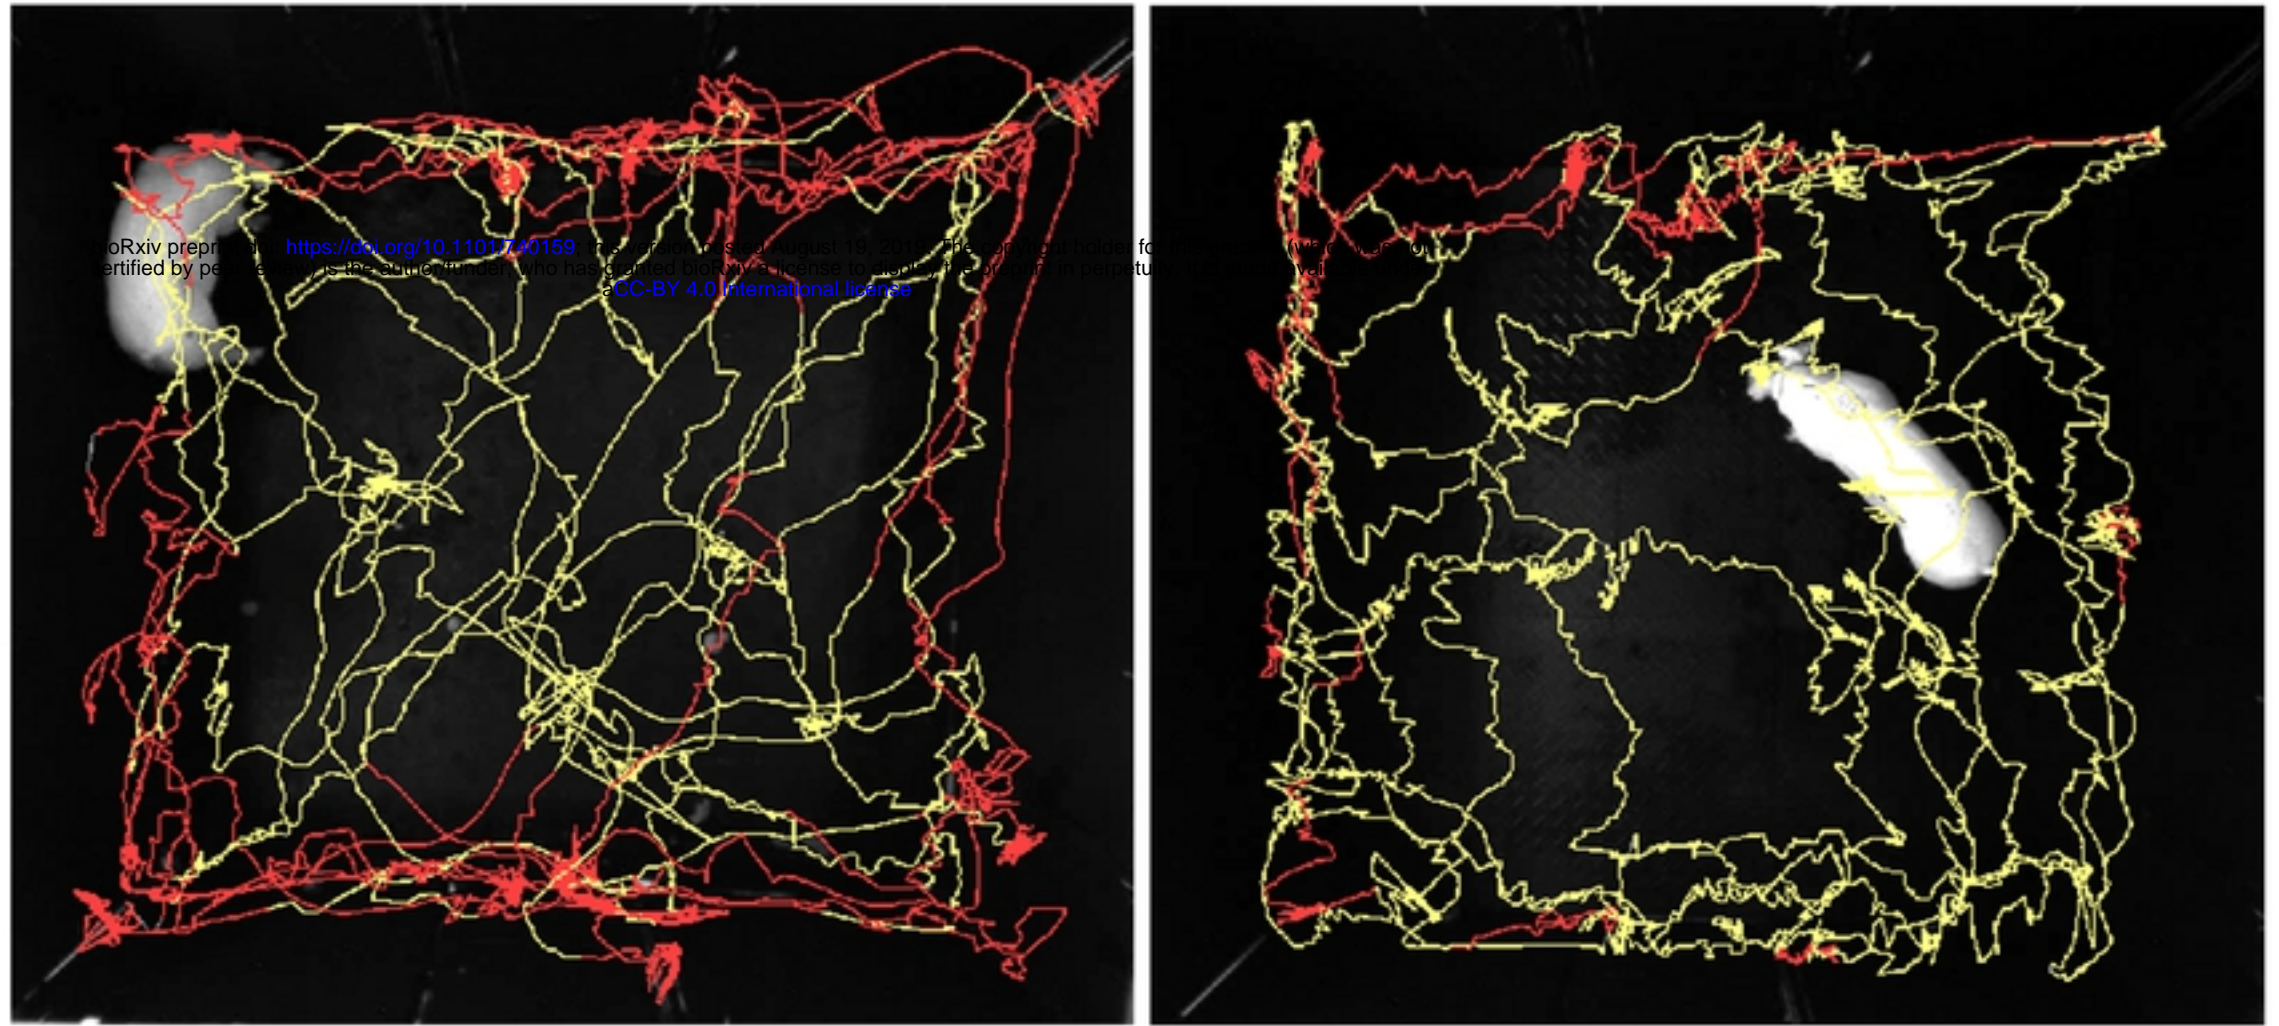

(C)

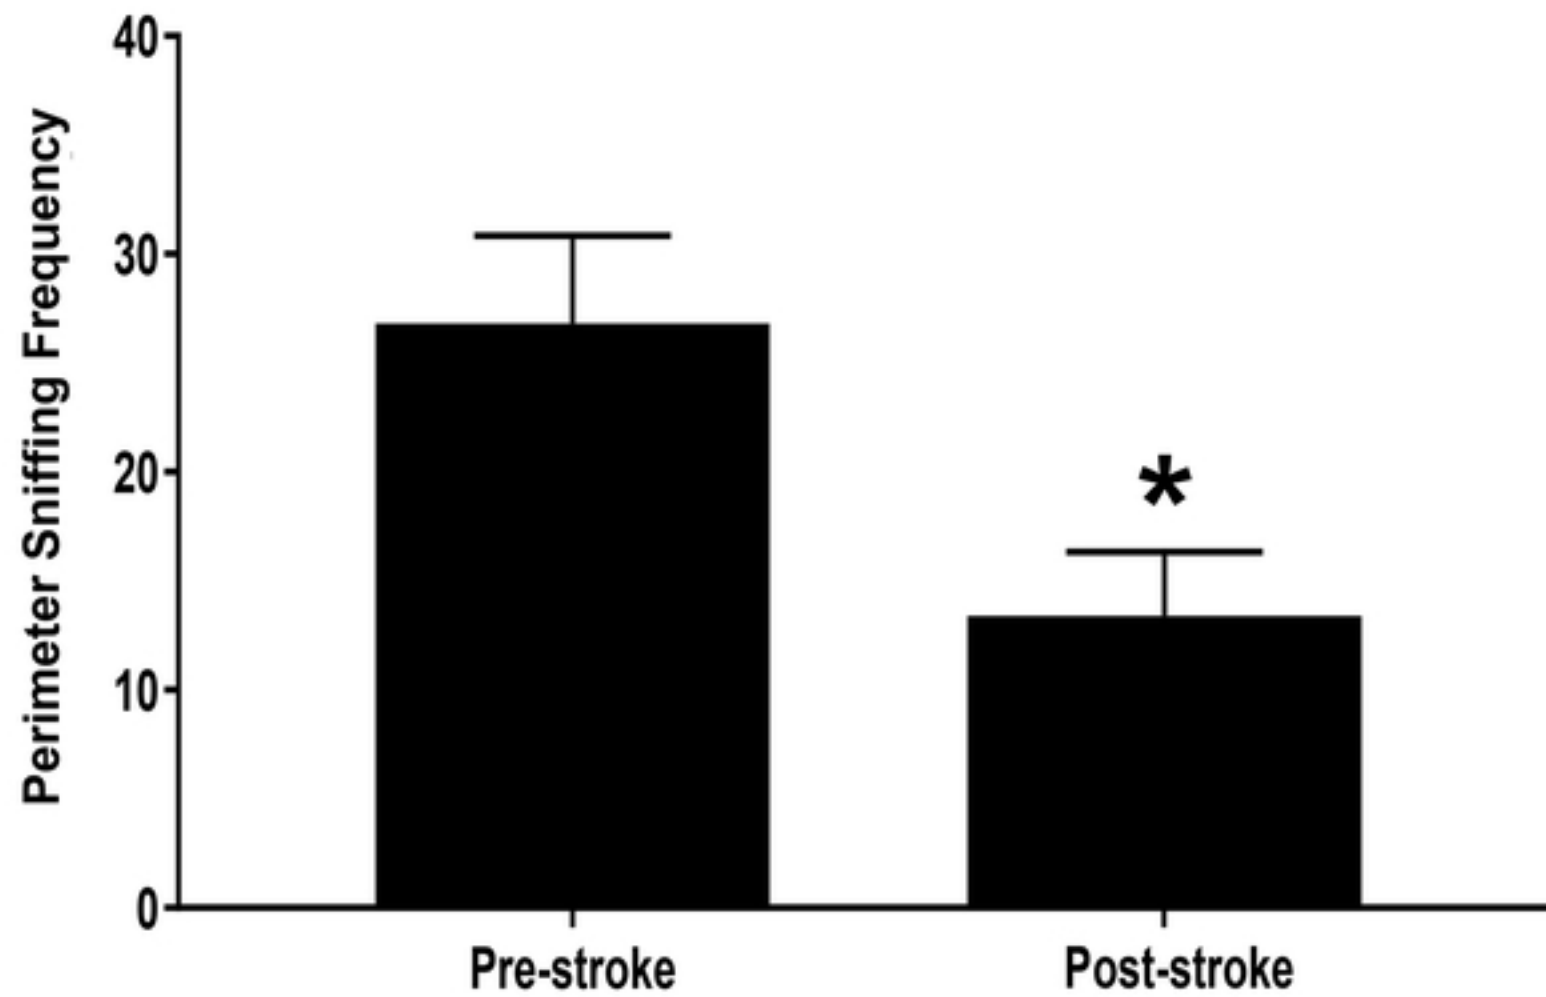

Figure 5

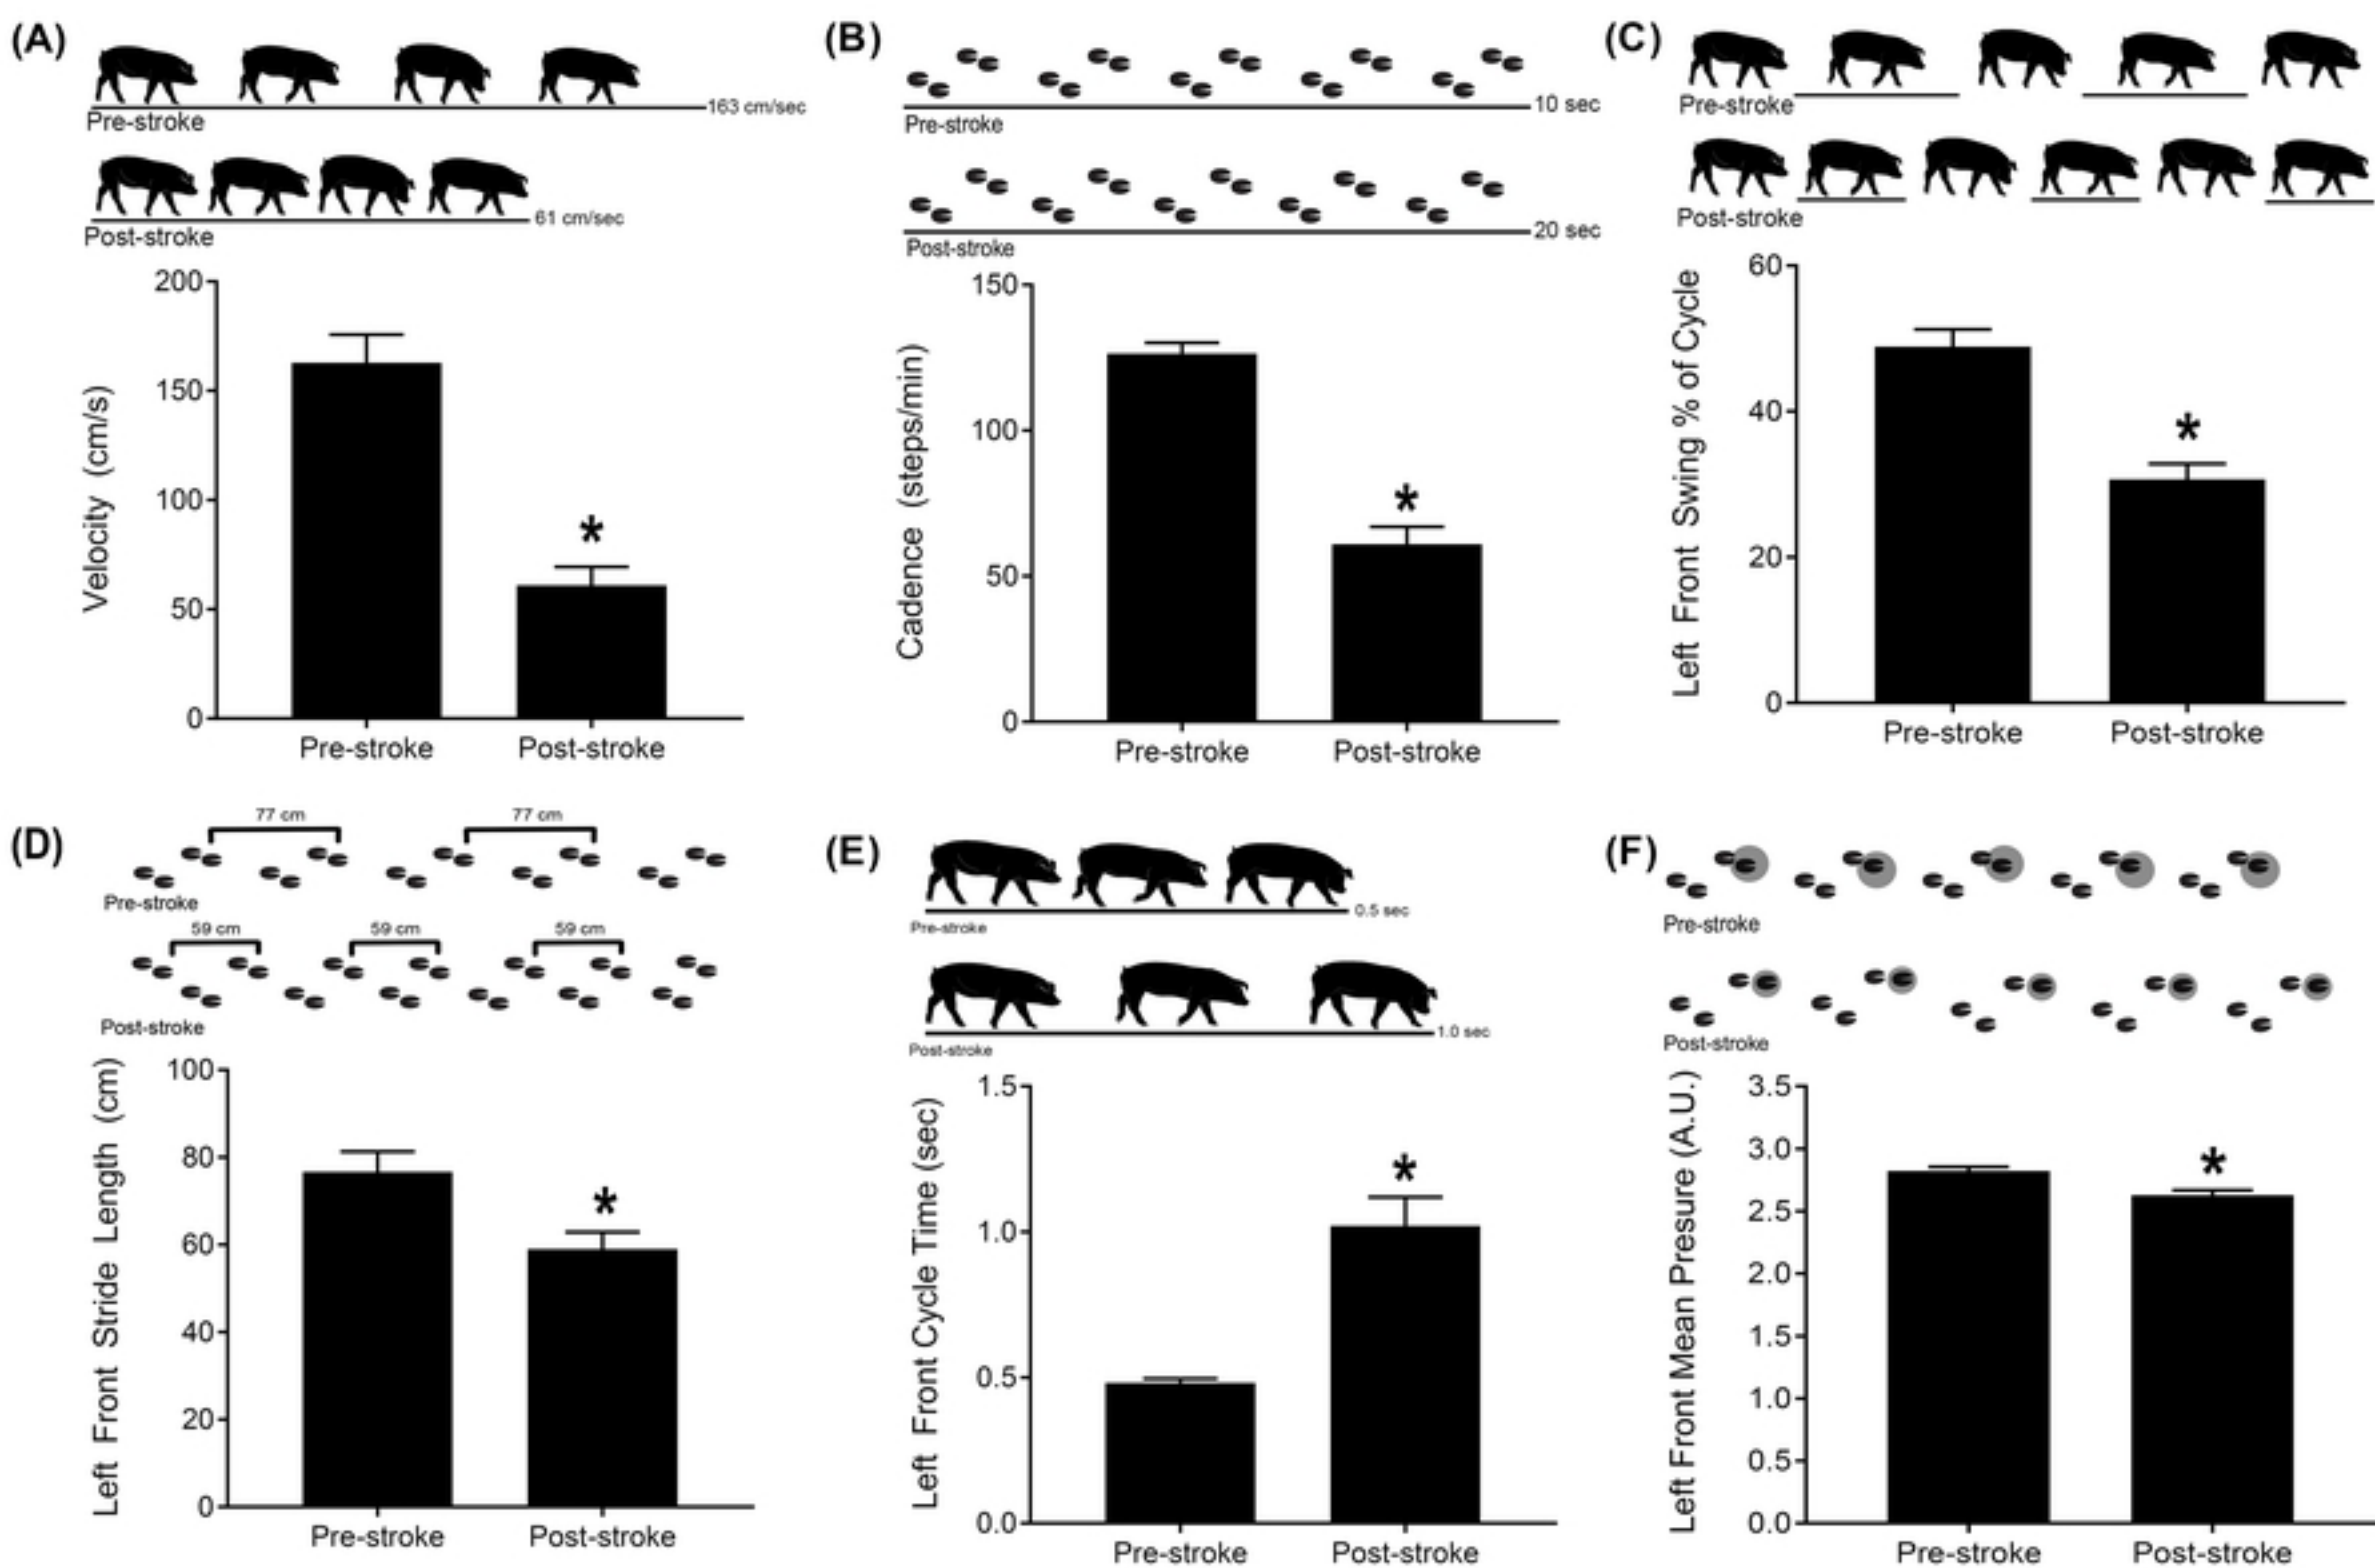

Figure 6
